# Supplementary material for: A direct and efficient preparation of 1-phenyltetrazol-5-yl sulfides from alcohols
Source: Royal Society of Chemistry journal article supplement (doi:10.1039/c0ob00863j), 2010-11-01

## Supporting Information for

# A Direct and Efficient Preparation of 1-Phenyltetrazol-5-yl Sulfides from Alcohols

Adam R. Ellwood and Michael J. Porter\*

Department of Chemistry, University College London, Christopher Ingold Building, 20 Gordon Street, London WC1H 0AJ, United Kingdom.

## Table of Contents

|        |                                                                                                                 |     |
|--------|-----------------------------------------------------------------------------------------------------------------|-----|
| 1.     | GENERAL EXPERIMENTAL.....                                                                                       | S2  |
| 2.     | EXPERIMENTAL PROCEDURES .....                                                                                   | S2  |
| 2.1    | <i>N</i> -(Ethylsulfanylmethylene)- <i>N,N</i> -dimethylammonium tetrafluoroborate ( <b>6</b> ).....            | S2  |
| 2.2    | General procedure for preparation of 1-phenyl-1( <i>H</i> )-tetrazol-5-yl sulfides.....                         | S2  |
| 2.2.1  | Ethyl 6-(1-phenyl-1( <i>H</i> )-tetrazol-5-ylsulfanyl)hexanoate ( <b>8a</b> ).....                              | S2  |
| 2.2.2  | 5-(Hex-5-enylsulfanyl)-1-phenyl-1( <i>H</i> )-tetrazole ( <b>8b</b> ).....                                      | S3  |
| 2.2.3  | 5-(3-Methylbut-3-enylsulfanyl)-1-phenyl-1( <i>H</i> )-tetrazole ( <b>8c</b> ).....                              | S3  |
| 2.2.4  | 5-(2-Methylpropylsulfanyl)-1-phenyl-1( <i>H</i> )-tetrazole ( <b>8d</b> ).....                                  | S3  |
| 2.2.5  | 1-Phenyl-5-(4-phenylbutan-2-ylsulfanyl)-1( <i>H</i> )-tetrazole ( <b>8e</b> ).....                              | S3  |
| 2.2.6  | 3-{Phenyl[2-(1-phenyl-1( <i>H</i> )-tetrazol-5-ylsulfanyl)ethyl]amino}propanenitrile ( <b>8f</b> ).....         | S4  |
| 2.2.7  | 1-Phenyl-5-[2-(tetrahydro-2( <i>H</i> )-pyran-2-yloxy)ethylsulfanyl]-1( <i>H</i> )-tetrazole ( <b>8g</b> )..... | S4  |
| 2.2.8  | 1-Phenyl-5-(tetrahydro-2( <i>H</i> )-pyran-2-ylsulfanyl)-1( <i>H</i> )-tetrazole ( <b>9</b> ).....              | S4  |
| 2.2.9  | <i>tert</i> -Butyl 3-(1-phenyl-1( <i>H</i> )-tetrazol-5-ylsulfanyl)propylcarbamate ( <b>8h</b> ).....           | S4  |
| 2.2.10 | 5-(1-Phenyl-1( <i>H</i> )-tetrazol-5-ylsulfanyl)pentan-1-ol ( <b>8i</b> ).....                                  | S5  |
| 2.2.11 | 5-[(4-Methylphenyl)methylsulfanyl]-1-phenyl-1( <i>H</i> )-1,2,3,4-tetrazole ( <b>8j</b> ).....                  | S5  |
| 2.2.12 | ( <i>E</i> )-5-(3-Phenylprop-2-enylsulfanyl)-1-phenyl-1( <i>H</i> )-tetrazole ( <b>8k</b> ).....                | S5  |
| 3.     | NMR SPECTRA .....                                                                                               | S6  |
| 3.1    | <i>N</i> -(Ethylsulfanylmethylene)- <i>N,N</i> -dimethylammonium tetrafluoroborate ( <b>6</b> ).....            | S6  |
| 3.2    | Ethyl 6-(1-phenyl-1( <i>H</i> )-tetrazol-5-ylsulfanyl)hexanoate ( <b>8a</b> ).....                              | S8  |
| 3.3    | 5-(Hex-5-enylsulfanyl)-1-phenyl-1( <i>H</i> )-tetrazole ( <b>8b</b> ).....                                      | S10 |
| 3.4    | 5-(3-Methylbut-3-enylsulfanyl)-1-phenyl-1( <i>H</i> )-tetrazole ( <b>8c</b> ).....                              | S12 |
| 3.5    | 5-(2-Methylpropylsulfanyl)-1-phenyl-1( <i>H</i> )-tetrazole ( <b>8d</b> ).....                                  | S14 |
| 3.5    | 1-Phenyl-5-(4-phenylbutan-2-ylsulfanyl)-1( <i>H</i> )-tetrazole ( <b>8e</b> ).....                              | S16 |
| 3.6    | 3-{Phenyl[2-(1-phenyl-1( <i>H</i> )-tetrazol-5-ylsulfanyl)ethyl]amino}propanenitrile ( <b>8f</b> ).....         | S17 |
| 3.7    | 1-Phenyl-5-[2-(tetrahydro-2( <i>H</i> )-pyran-2-yloxy)ethylsulfanyl]-1( <i>H</i> )-tetrazole ( <b>8g</b> )..... | S20 |
| 3.8    | 1-Phenyl-5-(tetrahydro-2( <i>H</i> )-pyran-2-ylsulfanyl)-1( <i>H</i> )-tetrazole ( <b>9</b> ).....              | S22 |
| 3.9    | <i>tert</i> -Butyl 3-(1-phenyl-1( <i>H</i> )-tetrazol-5-ylsulfanyl)propylcarbamate ( <b>8h</b> ).....           | S24 |
| 3.10   | 5-(1-Phenyl-1( <i>H</i> )-tetrazol-5-ylsulfanyl)pentan-1-ol ( <b>8i</b> ).....                                  | S26 |
| 3.11   | 5-[(4-Methylphenyl)methylsulfanyl]-1-phenyl-1( <i>H</i> )-1,2,3,4-tetrazole ( <b>8j</b> ).....                  | S28 |
| 3.12   | ( <i>E</i> )-5-(3-Phenylprop-2-enylsulfanyl)-1-phenyl-1( <i>H</i> )-tetrazole ( <b>8k</b> ).....                | S30 |

## 1. General Experimental

All reactions were carried out under argon with dry solvents. Dry toluene, dichloromethane and diethyl ether were obtained by passage through activated alumina columns under nitrogen. All other chemicals were used as obtained from commercial sources.

Flash column chromatography was carried out on silica gel (Kieselgel 600) or weakly acidic alumina (50-200  $\mu\text{m}$ ). "Petrol" refers to the fraction of petroleum ether that boils in the range 40–60 °C.

IR spectra were recorded of neat solids or liquids or of solvent casts, using a PerkinElmer Spectrum 100 instrument fitted with an ATR accessory.  $^1\text{H}$  and  $^{13}\text{C}$  NMR spectra were recorded as  $\text{CDCl}_3$  solutions on a Bruker AVANCE DRX600 spectrometer. Mass spectra were recorded by Dr Lisa Harris of the Christopher Ingold Laboratories on a VG70-SE instrument or a Thermo MAT 900 instrument. Melting points were measured on a Reichert-Jung THERMOVAR instrument or an Electrothermal 9100 apparatus and are uncorrected.

## 2. Experimental Procedures

### 2.1 *N*-(Ethylsulfanylmethylene)-*N,N*-dimethylammonium tetrafluoroborate (**6**)

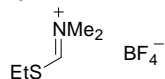

To a solution of triethyloxonium tetrafluoroborate (5.57 g, 29.3 mmol) in  $\text{CH}_2\text{Cl}_2$  (50 mL) was added *N,N*-dimethylthioformamide **5** (2.3 mL, 26.7 mmol) and the solution stirred at room temperature for 18 h. The mixture was concentrated *in vacuo* to approximately half of its original volume and then added dropwise to stirred  $\text{Et}_2\text{O}$  (100 mL); the solution was then placed in a refrigerator for 2 h. The resulting precipitate was collected by filtration under argon, washed with cold  $\text{Et}_2\text{O}$  ( $2 \times 25$  mL) and dried *in vacuo* for 10 min to give salt **6** (5.26 g, 96%) as a white crystalline solid which was stored at  $-25$  °C under argon; m.pt. 20-21 °C;  $\nu_{\text{max}}/\text{cm}^{-1}$  (solid) 3076, 1650, 1634, 1463;  $\delta_{\text{H}}$  ( $\text{CDCl}_3$ , 600 MHz) 1.51 (3H, t,  $J$  7.5 Hz,  $\text{CH}_2\text{CH}_3$ ), 3.40 (3H, s,  $\text{NCH}_3\text{CH}_3$ ), 3.41 (2H, q,  $J$  7.5 Hz,  $\text{CH}_2$ ), 3.73 (3H, s,  $\text{NCH}_3\text{CH}_3$ ), 9.57 (1H, s,  $\text{CH}$ );  $\delta_{\text{C}}$  ( $\text{CDCl}_3$ , 150 MHz) 15.6 ( $\text{CH}_2\text{CH}_3$ ), 30.1 ( $\text{CH}_2$ ), 42.4 and 49.4 ( $\text{N}(\text{CH}_3)_2$ ), 183.1 ( $\text{CH}$ );  $m/z$  (CI) 118 ( $[\text{EtSCH}=\text{NMe}_2]^+$ , 100%), 90 (48); HRMS found 118.0686,  $\text{C}_5\text{H}_{12}\text{NS}$  ( $[\text{EtSCH}=\text{NMe}_2]^+$ ) requires 118.0691.

### 2.2 General procedure for preparation of 1-phenyl-1(*H*)-tetrazol-5-yl sulfides.

To a solution of alcohol **2** in toluene (0.4-0.5 M) were added salt **6** (1.5 equiv.), imidazole (1.0 to 5.0 equiv) and 1-phenyl-1(*H*)-tetrazol-5-thiol **7** (1.2 to 2.0 equiv.), and the mixture heated to 90 °C. Upon completion of the reaction (monitored by TLC or  $^1\text{H}$  NMR analysis), the solvent was removed *in vacuo*. Purification by flash chromatography afforded pure sulfide **8**.

#### 2.2.1 Ethyl 6-(1-phenyl-1(*H*)-tetrazol-5-ylsulfanyl)hexanoate (**8a**)

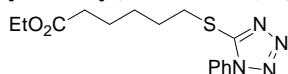

Purification by flash chromatography ( $\text{Al}_2\text{O}_3$ , petrol/ $\text{EtOAc}$  19:1→9:1) gave sulfide **8a** as a yellow oil in 76% yield;  $\nu_{\text{max}}/\text{cm}^{-1}$  ( $\text{CHCl}_3$  cast) 2980, 2937, 2865, 1729, 1597, 1500;  $\delta_{\text{H}}$  ( $\text{CDCl}_3$ , 600 MHz) 1.24 (3H, t,  $J$  7.3 Hz,  $\text{CH}_3$ ), 1.48 (2H, app. quin,  $J$  7.5 Hz,  $\text{CH}_2\text{CH}_2\text{CH}_2\text{S}$ ), 1.67 (2H, app. quin,  $J$  7.5 Hz,  $\text{CH}_2\text{CH}_2\text{C}=\text{O}$ ), 1.85 (2H, app. quin,  $J$  7.5 Hz,  $\text{CH}_2\text{CH}_2\text{S}$ ), 2.30 (2H, t,  $J$  7.5 Hz,  $\text{CH}_2\text{C}=\text{O}$ ), 3.39 (2H, t,  $J$  7.4 Hz,  $\text{CH}_2\text{S}$ ), 4.11 (2H, q,  $J$  7.3 Hz,  $\text{CH}_2\text{CH}_3$ ), 7.51-7.59 (5H, m, aromatic  $\text{CH}$ );  $\delta_{\text{C}}$  ( $\text{CDCl}_3$ , 150 MHz) 14.4 ( $\text{CH}_3$ ), 24.4 ( $\text{CH}_2\text{CH}_2\text{C}=\text{O}$ ), 28.2 ( $\text{CH}_2\text{CH}_2\text{CH}_2\text{S}$ ), 28.9 ( $\text{CH}_2\text{CH}_2\text{S}$ ), 33.2 ( $\text{CH}_2\text{S}$ ), 34.2 ( $\text{CH}_2\text{C}=\text{O}$ ), 60.4 ( $\text{CH}_2\text{CH}_3$ ), 124.0, 129.9 and 130.2 (aromatic  $\text{CH}$ ), 133.8 (aromatic  $\text{C}$ ), 154.5 ( $\text{NCS}$ ), 173.6 ( $\text{C}=\text{O}$ );  $m/z$  (CI) 321 ( $\text{MH}^+$ , 100%), 275 ( $\text{MH}^+-\text{EtOH}$ , 41), 119 (55); HRMS found 321.1379,  $\text{C}_{15}\text{H}_{21}\text{N}_4\text{O}_2\text{S}$  ( $\text{MH}^+$ ) requires 321.1385.

### 2.2.2 5-(Hex-5-enylsulfanyl)-1-phenyl-1(H)-tetrazole (**8b**)<sup>1</sup>

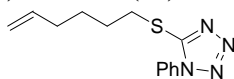

Purification by flash chromatography (Al<sub>2</sub>O<sub>3</sub>, petrol→petrol/EtOAc 19:1) gave sulfide **8b** as a colorless oil in 70% yield;  $\nu_{\max}/\text{cm}^{-1}$  (CH<sub>2</sub>Cl<sub>2</sub> cast) 3071, 2927, 2856, 2640, 1597, 1499;  $\delta_{\text{H}}$  (CDCl<sub>3</sub>, 600 MHz) 1.54 (2H, app. quin, *J* 7.4 Hz, CH<sub>2</sub>CH<sub>2</sub>CH=CH<sub>2</sub>), 1.83 (2H, app. quin, *J* 7.4 Hz, CH<sub>2</sub>CH<sub>2</sub>S), 2.08 (2H, q, *J* 7.0 Hz, CH<sub>2</sub>CH=CH<sub>2</sub>), 3.39 (2H, t, *J* 7.4 Hz, CH<sub>2</sub>S), 4.95 (1H, d, *J* 10.0 Hz) and 5.00 (1H, d, *J* 17.1 Hz, CH<sub>2</sub>=CH), 5.77 (1H, ddt, *J* 17.1, 10.0, 7.0 Hz, CH<sub>2</sub>=CH), 7.50-7.59 (5H, m, aromatic CH);  $\delta_{\text{C}}$  (CDCl<sub>3</sub>, 150 MHz) 27.9 (CH<sub>2</sub>CH<sub>2</sub>CH=CH<sub>2</sub>), 28.6 (CH<sub>2</sub>CH<sub>2</sub>S), 33.2 (CH<sub>2</sub>S), 33.3 (CH<sub>2</sub>CH=CH<sub>2</sub>), 115.2 (CH<sub>2</sub>=CH), 123.9, 130.0 and 130.2 (aromatic CH), 133.8 (aromatic C), 138.1 (CH<sub>2</sub>=CH), 154.6 (NCS); *m/z* (CI) 261 (MH<sup>+</sup>, 100%), 207 (28); HRMS found 261.1165, C<sub>13</sub>H<sub>17</sub>N<sub>4</sub>S (MH<sup>+</sup>) requires 261.1174.

### 2.2.3 5-(3-Methylbut-3-enylsulfanyl)-1-phenyl-1(H)-tetrazole (**8c**)<sup>2</sup>

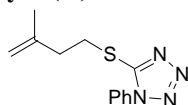

Purification by flash chromatography (SiO<sub>2</sub>, petrol→petrol/EtOAc 24:1) gave sulfide **8c** as a pale yellow oil in 67% yield;  $\nu_{\max}/\text{cm}^{-1}$  (CDCl<sub>3</sub> cast) 3078, 2970, 2937, 1649, 1597, 1499;  $\delta_{\text{H}}$  (CDCl<sub>3</sub>, 600 MHz) 1.77 (3H, s, CH<sub>3</sub>), 2.53 (2H, t, *J* 7.5 Hz, CH<sub>2</sub>CH<sub>2</sub>S), 3.53 (2H, t, *J* 7.3 Hz, CH<sub>2</sub>S), 4.77 (1H, s) and 4.83 (1H, s, CH<sub>2</sub>=C), 7.51-7.59 (5H, m, aromatic CH);  $\delta_{\text{C}}$  (CDCl<sub>3</sub>, 150 MHz) 22.2 (CH<sub>3</sub>), 31.5 (CH<sub>2</sub>CH<sub>2</sub>S), 37.0 (CH<sub>2</sub>S), 112.6 (CH<sub>2</sub>=C), 124.0, 129.9 and 130.2 (aromatic CH), 133.8 (aromatic C), 142.6 (CH<sub>2</sub>=C), 154.5 (SCN); *m/z* (EI) 246 (M<sup>+</sup>, 40%), 159 (45), 135 (32), 85 (100); HRMS found 246.0935, C<sub>12</sub>H<sub>14</sub>N<sub>4</sub>S (M<sup>+</sup>) requires 246.0939.

### 2.2.4 5-(2-Methylpropylsulfanyl)-1-phenyl-1(H)-tetrazole (**8d**)<sup>3</sup>

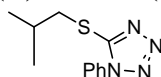

Purification by flash chromatography (SiO<sub>2</sub>, petrol→petrol/Et<sub>2</sub>O 19:1) gave sulfide **8d** as a colorless oil in 75% yield;  $\nu_{\max}/\text{cm}^{-1}$  (film) 2960, 2929, 2871, 1597, 1499;  $\delta_{\text{H}}$  (CDCl<sub>3</sub>, 600 MHz) 1.05 (6H, d, *J* 6.8 Hz, CH(CH<sub>3</sub>)<sub>2</sub>), 2.10 (1H, nonet, *J* 6.8 Hz, CH(CH<sub>3</sub>)<sub>2</sub>), 3.31 (2H, d, *J* 6.8 Hz, CH<sub>2</sub>), 7.52-7.60 (5H, m, aromatic CH);  $\delta_{\text{C}}$  (CDCl<sub>3</sub>, 150 MHz) 21.8 (CH(CH<sub>3</sub>)<sub>2</sub>), 28.4 (CH(CH<sub>3</sub>)<sub>2</sub>), 41.9 (CH<sub>2</sub>), 124.0, 129.9 and 130.2 (aromatic CH), 133.9 (aromatic C), 154.8 (SCN); *m/z* (CI) 235 (MH<sup>+</sup>, 100%); HRMS found 235.1022, C<sub>11</sub>H<sub>15</sub>N<sub>4</sub>S (MH<sup>+</sup>) requires 235.1017.

### 2.2.5 1-Phenyl-5-(4-phenylbutan-2-ylsulfanyl)-1(H)-tetrazole (**8e**)

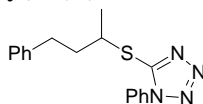

Purification by flash chromatography (SiO<sub>2</sub>, petrol→petrol/EtOAc 24:1) gave sulfide **8e** as a colorless oil in 83% yield;  $\nu_{\max}/\text{cm}^{-1}$  (CDCl<sub>3</sub> cast) 3063, 3027, 2926, 2859, 1597, 1499, 1455, 1387;  $\delta_{\text{H}}$  (CDCl<sub>3</sub>, 600 MHz) 1.56 (3H, d, *J* 6.8 Hz, CH<sub>3</sub>), 2.02 (1H, ddt, *J* 13.7, 9.5, 6.8 Hz) and 2.14 (1H, ddt, *J* 13.7, 9.5, 6.8 Hz, CH<sub>2</sub>CHS), 2.72-2.83 (2H, m, PhCH<sub>2</sub>), 4.07 (1H, sext., *J* 6.8 Hz, CHS), 7.15-7.21 (3H, m), 7.25-7.30 (2H, m) and 7.51-7.60 (5H, m, aromatic CH);  $\delta_{\text{C}}$  (CDCl<sub>3</sub>, 150 MHz) 21.6 (CH<sub>3</sub>), 33.3 (PhCH<sub>2</sub>), 38.3 (CH<sub>2</sub>CHS), 44.5 (CHS), 124.2, 126.3, 128.5, 128.6, 129.9 and 130.2 (aromatic CH), 133.8 and 141.0 (aromatic C), 154.0 (SCN); *m/z* (CI) 311 (MH<sup>+</sup>, 100%), 119 (58); HRMS found 311.1327, C<sub>17</sub>H<sub>19</sub>N<sub>4</sub>S (MH<sup>+</sup>) requires 311.1330.

<sup>1</sup> A. K. Ghosh and B. Zajc, *J. Org. Chem.* 2009, **74**, 8531.

<sup>2</sup> S. Hosokawa, K. Yokota, K. Imamura, Y. Suzuki, M. Kawarasaki and K. Tatsuta, *Tetrahedron Lett.* 2006, **47**, 5415.

<sup>3</sup> C. M. DiBlasi, D. E. Macks and D. S. Tan, *Org. Lett.* 2005, **7**, 1777.

### 2.2.6 3-{Phenyl[2-(1-phenyl-1(*H*)-tetrazol-5-ylsulfanyl)ethyl]amino}propanenitrile (**8f**)

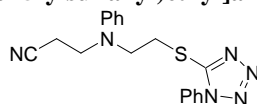

Purification by flash chromatography (SiO<sub>2</sub>, petrol/EtOAc 17:3→4:1) gave sulfide **8f** as a viscous colorless oil in 88% yield;  $\nu_{\max}/\text{cm}^{-1}$  (neat) 3063, 2932, 2248, 1693, 1597, 1499;  $\delta_{\text{H}}$  (CDCl<sub>3</sub>, 600 MHz) 2.65 (2H, t, *J* 6.8 Hz, CH<sub>2</sub>CN), 3.53 (2H, t, *J* 7.2 Hz, CH<sub>2</sub>S), 3.77 (2H, t, *J* 6.8 Hz, CH<sub>2</sub>CH<sub>2</sub>CN), 3.89 (2H, t, *J* 7.2 Hz, CH<sub>2</sub>CH<sub>2</sub>S), 6.80-6.84 (3H, m), 7.27-7.32 (2H, m) and 7.53-7.60 (5H, m, aromatic CH);  $\delta_{\text{C}}$  (CDCl<sub>3</sub>, 150 MHz) 16.3 (CH<sub>2</sub>CN), 30.1 (CH<sub>2</sub>S), 47.6 (CH<sub>2</sub>CH<sub>2</sub>CN), 50.9 (CH<sub>2</sub>CH<sub>2</sub>S), 113.2 (aromatic CH), 118.4 (CN), 118.7, 123.9, 130.0, 130.0 and 130.4 (aromatic CH), 133.6 (aromatic CN<sub>tetrazole</sub>), 145.7 (aromatic CN<sub>amine</sub>), 154.0 (SCN); *m/z* (ES<sup>+</sup>) 373 (MNa<sup>+</sup>, 100%); HRMS found 373.1211, C<sub>18</sub>H<sub>18</sub>N<sub>6</sub>NaS (MNa<sup>+</sup>) requires 373.1211.

### 2.2.7 1-Phenyl-5-[2-(tetrahydro-2(*H*)-pyran-2-yloxy)ethylsulfanyl]-1(*H*)-tetrazole (**8g**)

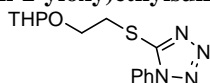

Purification by flash chromatography (Al<sub>2</sub>O<sub>3</sub>, petrol/EtOAc 9:1→4:1) gave sulfide **8g** as a colorless oil in 80% yield;  $\nu_{\max}/\text{cm}^{-1}$  (CDCl<sub>3</sub> cast) 2942, 2871, 1597, 1499;  $\delta_{\text{H}}$  (CDCl<sub>3</sub>, 600 MHz) 1.45-1.60 (4H, m, OCH<sub>2</sub>CH<sub>2</sub>CH<sub>2</sub>CH<sub>2</sub>), 1.68 (1H, m, OCH<sub>2</sub>CH<sub>2</sub>CH<sub>2</sub>), 1.77 (1H, m, OCH<sub>2</sub>CH<sub>2</sub>CH<sub>2</sub>), 3.49 (1H, m, OCH<sub>2</sub>CH<sub>2</sub>CH<sub>2</sub>), 3.61 (1H, dt, *J* 13.6, 5.9 Hz) and 3.66 (1H, dt, *J* 13.6, 5.9 Hz, CH<sub>2</sub>S), 3.80-3.85 (2H, m, OCH<sub>2</sub>CH<sub>2</sub>CH<sub>2</sub> and OCH<sub>2</sub>CH<sub>2</sub>S), 4.08 (1H, dt, *J* 10.7, 5.9 Hz, OCH<sub>2</sub>CH<sub>2</sub>S), 4.63 (1H, dd, *J* 4.1, 2.9 Hz, OCHO), 7.51-7.59 (5H, m, aromatic CH);  $\delta_{\text{C}}$  (CDCl<sub>3</sub>, 150 MHz)  $\delta$  19.5 (OCH<sub>2</sub>CH<sub>2</sub>CH<sub>2</sub>), 25.4 (CH<sub>2</sub>CH<sub>2</sub>), 30.5 (OCH<sub>2</sub>CH<sub>2</sub>CH<sub>2</sub>), 33.6 (CH<sub>2</sub>S), 62.5 (OCH<sub>2</sub>CH<sub>2</sub>CH<sub>2</sub>), 65.6 (OCH<sub>2</sub>CH<sub>2</sub>S), 99.1 (OCHO), 124.0, 129.9 and 130.3 (aromatic CH), 133.8 (aromatic C), 154.4 (SCN); *m/z* (ES<sup>+</sup>) 329 (MNa<sup>+</sup>, 80%), 301 (31), 223 (100); HRMS found 329.1052, C<sub>14</sub>H<sub>18</sub>N<sub>4</sub>O<sub>2</sub>NaS (MNa<sup>+</sup>) requires 329.1048.

### 2.2.8 1-Phenyl-5-(tetrahydro-2(*H*)-pyran-2-ylsulfanyl)-1(*H*)-tetrazole (**9**)

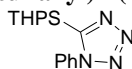

Obtained in the reaction of **2f** in the presence of 1 equiv. imidazole. Purification by flash chromatography (Al<sub>2</sub>O<sub>3</sub>, petrol→petrol/EtOAc 19:1) gave sulfide **9** as a white solid in 39% yield; m.pt. 69-71 °C;  $\nu_{\max}/\text{cm}^{-1}$  (solid) 2966, 2941, 2851, 1595, 1498;  $\delta_{\text{H}}$  (CDCl<sub>3</sub>, 600 MHz) 1.68 (1H, m, OCH<sub>2</sub>CH<sub>2</sub>), 1.73-1.83 (2H, m, OCH<sub>2</sub>CH<sub>2</sub>CH<sub>2</sub>), 2.04 (1H, m, SCHCH<sub>2</sub>), 2.11-2.20 (1H, m, OCH<sub>2</sub>CH<sub>2</sub>CH<sub>2</sub>), 2.36 (1H, dddd, *J* 13.1 11.8, 10.1, 4.2 Hz, SCHCH<sub>2</sub>), 3.80 (1H, td, *J* 11.5, 2.7 Hz) and 4.16 (1H, m, OCH<sub>2</sub>), 5.98 (1H, dd, *J* 10.1, 2.8 Hz, OCHS), 7.48-7.57 (3H, m) and 7.90-7.93 (2H, m, aromatic CH);  $\delta_{\text{C}}$  (CDCl<sub>3</sub>, 150 MHz) 22.3 (OCH<sub>2</sub>CH<sub>2</sub>CH<sub>2</sub>), 24.8 (OCH<sub>2</sub>CH<sub>2</sub>), 29.1 (SCHCH<sub>2</sub>), 68.5 (OCH<sub>2</sub>), 83.5 (OCHS), 124.2, 129.4 and 129.8 (aromatic CH), 134.6 (aromatic C), 163.7 (SCN); *m/z* (CI) 263 (MH<sup>+</sup>, 100%), 179 (100), 85 (23); HRMS found 263.0958, C<sub>12</sub>H<sub>15</sub>ON<sub>4</sub>S (MH<sup>+</sup>) requires 263.0967.

### 2.2.9 *tert*-Butyl 3-(1-phenyl-1(*H*)-tetrazol-5-ylsulfanyl)propylcarbamate (**8h**)

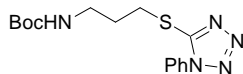

Purification by flash chromatography (Al<sub>2</sub>O<sub>3</sub>, petrol/EtOAc 9:1→17:3) gave sulfide **8h** as a cloudy yellow oil;  $\nu_{\max}/\text{cm}^{-1}$  (CDCl<sub>3</sub> cast) 3342 br, 2978, 2929, 1696, 1597, 1500;  $\delta_{\text{H}}$  (CDCl<sub>3</sub>, 600 MHz) 1.43 (9H, s, C(CH<sub>3</sub>)<sub>3</sub>), 2.00-2.07 (2H, m, CH<sub>2</sub>CH<sub>2</sub>N), 3.22-3.30 (2H, m, CH<sub>2</sub>N), 3.43 (2H, td, *J* 6.9, 2.0 Hz, CH<sub>2</sub>S), 4.81-5.00 (1H, br s, NH), 7.51-7.60 (5H, m, aromatic CH);  $\delta_{\text{C}}$  (CDCl<sub>3</sub>, 150 MHz) 28.5 (C(CH<sub>3</sub>)<sub>3</sub>), 29.8 (CH<sub>2</sub>CH<sub>2</sub>N), 30.6 (CH<sub>2</sub>S), 38.9 (CH<sub>2</sub>N), 79.5 (C(CH<sub>3</sub>)<sub>3</sub>), 124.0, 129.9 and 130.3 (aromatic CH), 133.7 (aromatic C), 154.5 (SCN), 156.2 (C=O); *m/z* (EI) 335 (M<sup>+</sup>, 8%), 279 (100); HRMS found 335.1420, C<sub>15</sub>H<sub>21</sub>N<sub>5</sub>O<sub>2</sub>S (M<sup>+</sup>) requires 335.1416.

### 2.2.10 5-(1-Phenyl-1(H)-tetrazol-5-ylsulfanyl)pentan-1-ol (**8i**)

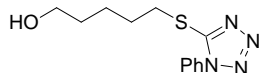

Purification by flash chromatography (SiO<sub>2</sub>, petrol/EtOAc 7:3→1:1) gave sulfide **8i** as a colorless oil;  $\nu_{\max}/\text{cm}^{-1}$  (CDCl<sub>3</sub> cast) 3414 br, 2941, 2865, 1597, 1500;  $\delta_{\text{H}}$  (CDCl<sub>3</sub>, 600 MHz) 1.54 (2H, m, CH<sub>2</sub>CH<sub>2</sub>CH<sub>2</sub>O), 1.62 (2H, m, CH<sub>2</sub>CH<sub>2</sub>O), 1.88 (2H, quin., *J* 7.3 Hz, CH<sub>2</sub>CH<sub>2</sub>S), 3.40 (2H, t, *J* 7.3 Hz, CH<sub>2</sub>S), 3.66 (2H, t, *J* 6.3 Hz, CH<sub>2</sub>O), 7.51-7.60 (5H, m, aromatic CH);  $\delta_{\text{C}}$  (CDCl<sub>3</sub>, 150 MHz) 25.0 (CH<sub>2</sub>CH<sub>2</sub>CH<sub>2</sub>O), 29.0 (CH<sub>2</sub>CH<sub>2</sub>S), 32.1 (CH<sub>2</sub>CH<sub>2</sub>O), 33.3 (CH<sub>2</sub>S), 62.7 (CH<sub>2</sub>O), 124.0, 129.9 and 130.0 (aromatic CH), 133.8 (aromatic C), 154.5 (SCN); *m/z* (CI) 265 (MH<sup>+</sup>, 100%); HRMS found 265.1114, C<sub>12</sub>H<sub>17</sub>ON<sub>4</sub>S (MH<sup>+</sup>) requires 265.1123.

### 2.2.11 5-[(4-Methylphenyl)methylsulfanyl]-1-phenyl-1(H)-1,2,3,4-tetrazole (**8j**)<sup>4</sup>

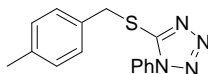

Purification by flash chromatography (SiO<sub>2</sub>, petrol→petrol/EtOAc 19:1) gave sulfide **8j** as a thick pale yellow oil;  $\nu_{\max}/\text{cm}^{-1}$  (CDCl<sub>3</sub> cast) 3043, 2922, 1597, 1515, 1499;  $\delta_{\text{H}}$  (CDCl<sub>3</sub>, 600 MHz) 2.33 (3H, s, CH<sub>3</sub>), 4.60 (2H, s, CH<sub>2</sub>), 7.13 (2H, d, *J* 7.9 Hz, CH<sub>3</sub>CCH), 7.31 (2H, d, *J* 7.9 Hz, SCH<sub>2</sub>CCH), 7.50-7.54 (5H, m, aromatic CH);  $\delta_{\text{C}}$  (CDCl<sub>3</sub>, 150 MHz) 21.3 (CH<sub>3</sub>), 37.6 (CH<sub>2</sub>), 123.9, 129.3, 129.6, 129.9 and 130.2 (aromatic CH), 132.2 (SCH<sub>2</sub>C), 133.7 (NCCH), 138.2 (CH<sub>3</sub>C), 154.1 (SCN); *m/z* (EI) 282 (M<sup>+</sup>, 30%), 221 (22), 137 (21), 118 (19), 105 (100); HRMS found 282.0927, C<sub>15</sub>H<sub>14</sub>N<sub>4</sub>S (M<sup>+</sup>) requires 282.0934.

### 2.2.12 (E)-5-(3-Phenylprop-2-enylsulfanyl)-1-phenyl-1(H)-tetrazole (**8k**)<sup>5</sup>

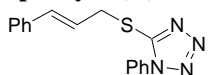

Purification by flash chromatography (SiO<sub>2</sub>, petrol→petrol/EtOAc 19:1) gave sulfide **8k** as a thick pale yellow oil;  $\nu_{\max}/\text{cm}^{-1}$  (CDCl<sub>3</sub> cast) 3060, 3027, 1597, 1499;  $\delta_{\text{H}}$  (CDCl<sub>3</sub>, 600 MHz) 4.21 (2H, dd, *J* 7.5, 1.1 Hz, SCH<sub>2</sub>), 6.36 (1H, dt, *J* 15.7, 7.5 Hz, SCH<sub>2</sub>CH), 6.71 (1H, d, *J* 15.7 Hz, PhCH), 7.24 (1H, m), 7.28-7.32 (2H, m), 7.34-7.37 (2H, m) and 7.51-7.60 (5H, m, aromatic CH);  $\delta_{\text{C}}$  (CDCl<sub>3</sub>, 150 MHz) 36.0 (SCH<sub>2</sub>), 122.5 (SCH<sub>2</sub>CH), 124.0, 126.7, 128.3, 128.8, 129.9 and 130.3 (aromatic CH), 133.7 (NCCH), 135.3 (PhCH), 136.1 (CCH=CH), 153.9 (SCN); *m/z* (EI) 294 (M<sup>+</sup>, 17%), 266 (16), 265 (16), 233 (15), 147 (17), 118 (22), 117 (100); HRMS found 294.0925, C<sub>16</sub>H<sub>14</sub>N<sub>4</sub>S (M<sup>+</sup>) requires 294.0934.

<sup>4</sup> K. Waisser, J. Adamec, J. Kuneš and J. Kaustová, *Chem. Pap.* 2004, **58**, 214.

<sup>5</sup> (a) K. Takeda, K. Tsuboyama, K. Torii, M. Murata and H. Ogura, *Tetrahedron Lett.* 1988, **29**, 4105; (b) K. Tsuboyama, K. Takeda, K. Torii and H. Ogura, *Chem. Pharm. Bull.* 1990, **38**, 2357.

### 3. NMR Spectra

#### 3.1 *N*-(Ethylsulfanylmethylene)-*N,N*-dimethylammonium tetrafluoroborate

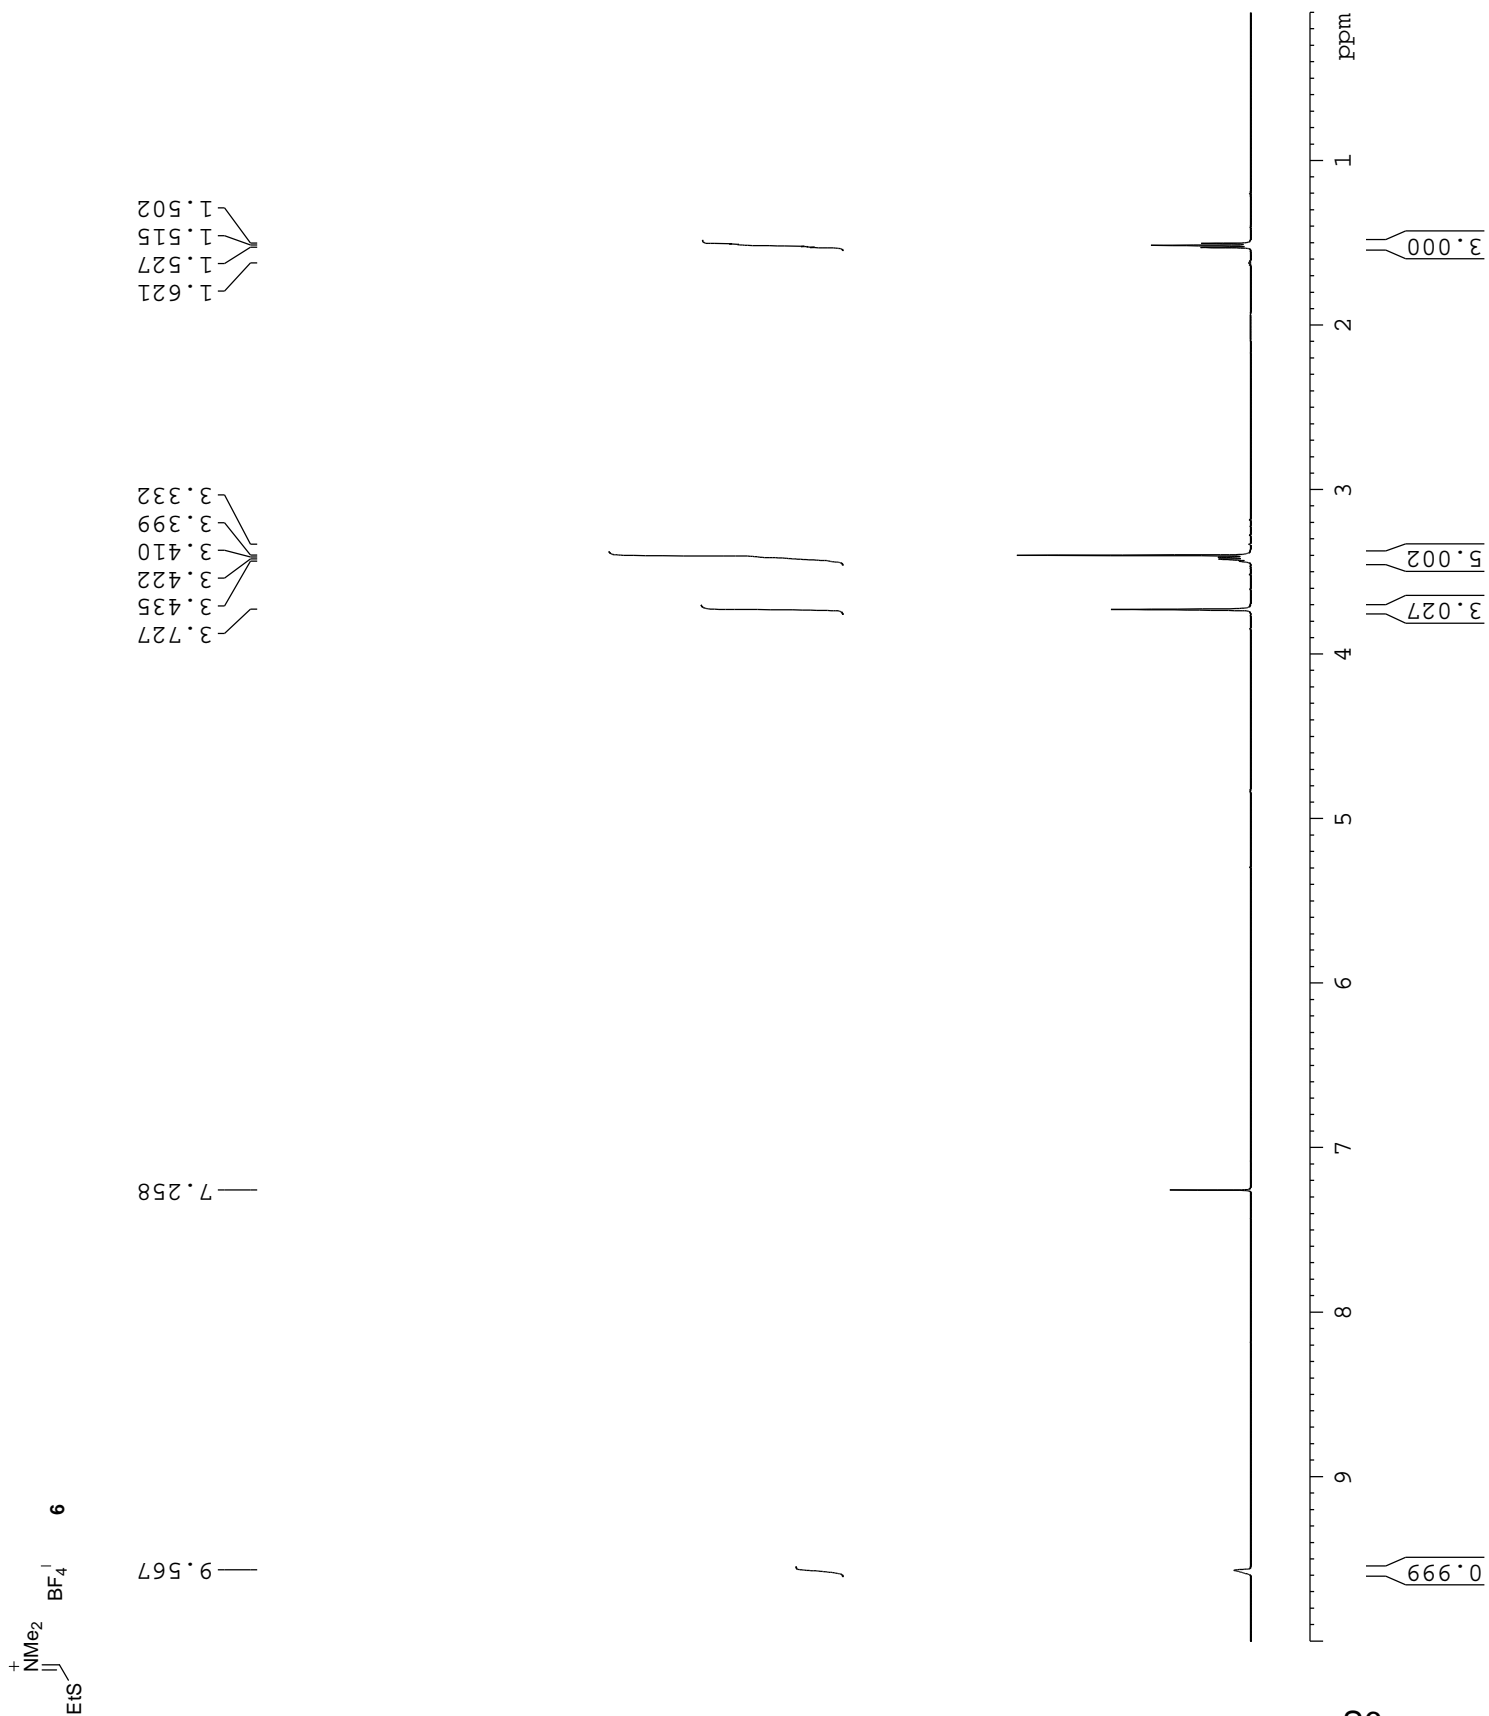

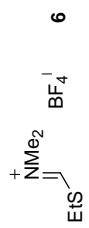

— 183.063

— 77.355  
— 77.144  
— 76.932  
— 65.990  
— 49.445  
— 42.443  
— 30.114  
— 15.596

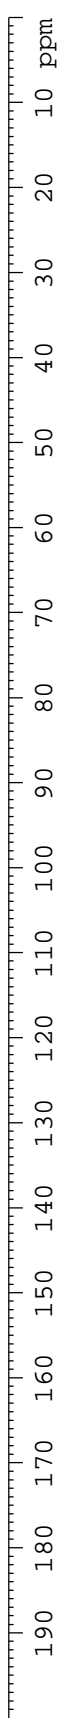

3.2 Ethyl 6-(1-phenyl-1(H)-tetrazol-5-ylsulfanyl)hexanoate (8a)

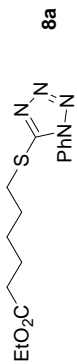

4.099  
4.087  
4.075  
4.063  
3.372  
3.360  
3.348  
2.285  
2.273  
2.261  
1.847  
1.834  
1.822  
1.809  
1.797  
1.662  
1.650  
1.637  
1.624  
1.611  
1.480  
1.470  
1.467  
1.460  
1.454  
1.445  
1.441

7.552  
7.544  
7.539  
7.535  
7.526  
7.521  
7.518  
7.513  
7.510  
7.507  
7.503  
7.500  
7.496  
7.493  
7.489  
7.258

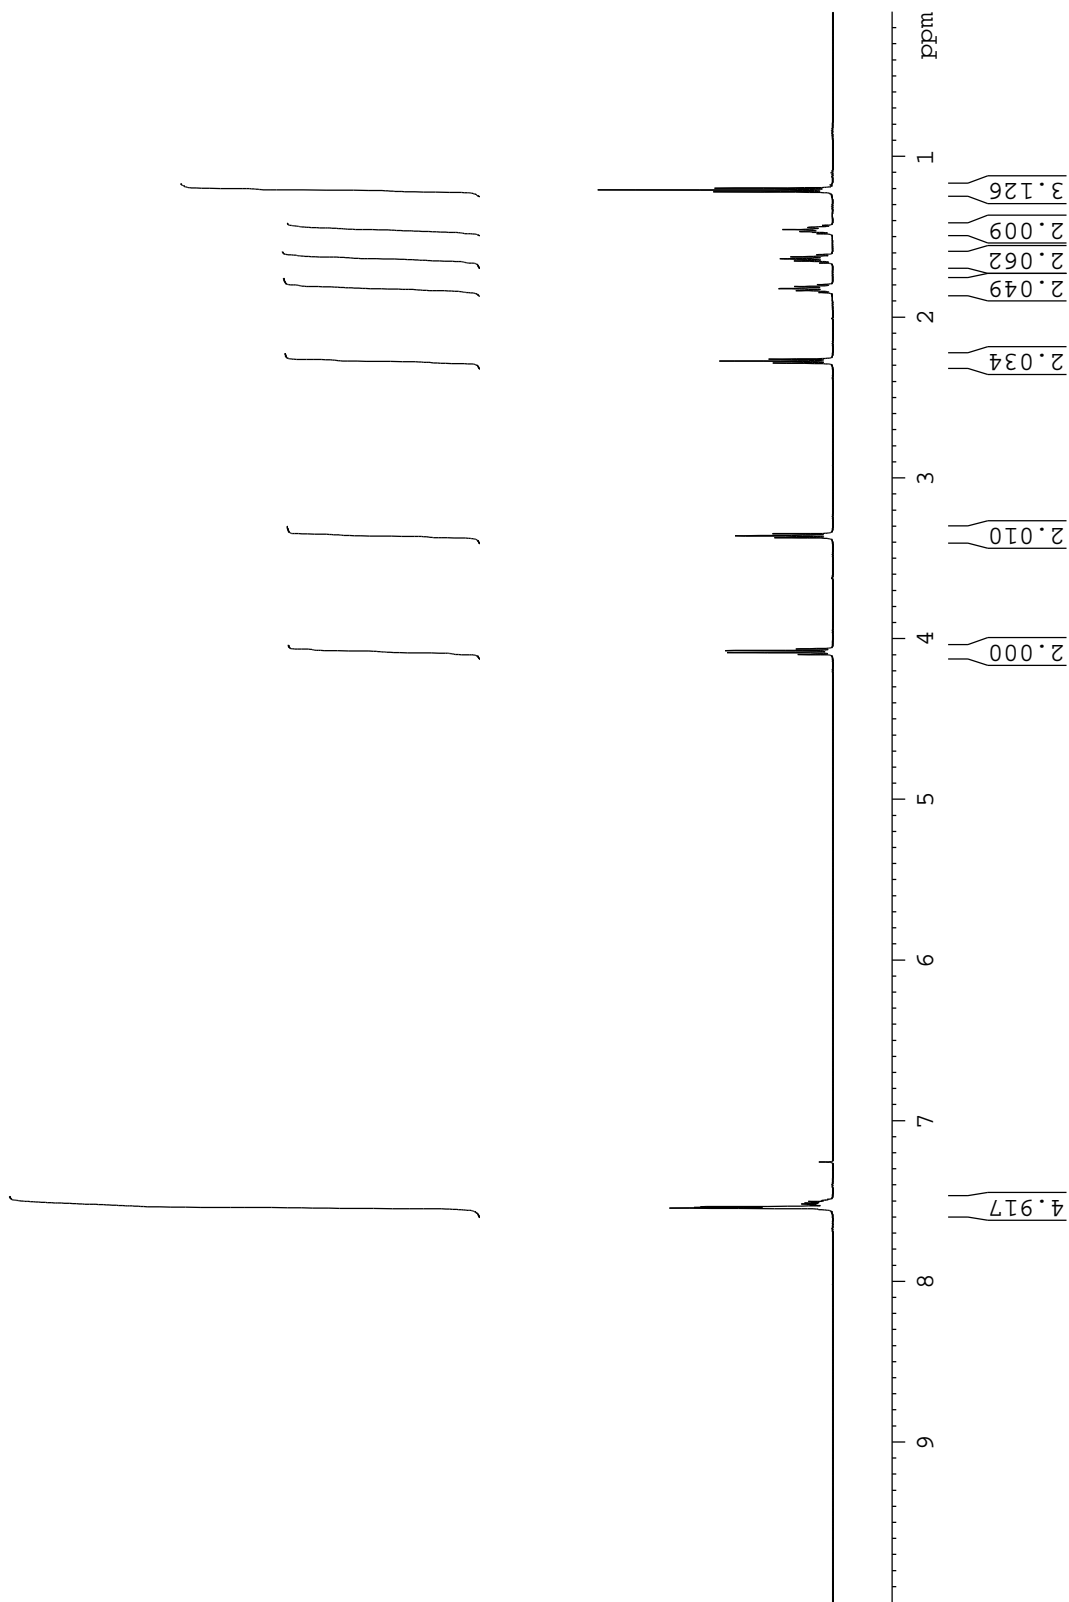



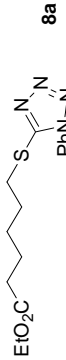

- 173.533
- 154.464
- 133.970
- 133.763
- 133.534
- 130.211
- 130.093
- 129.971
- 129.890
- 129.692
- 124.122
- 123.925
- 123.713
- 123.685
- 77.426
- 77.214
- 77.002
- 62.686
- 60.396
- 34.350
- 34.233
- 34.123
- 33.921
- 33.129
- 29.785
- 28.880
- 28.779
- 28.220
- 28.131
- 24.760
- 24.520
- 24.417
- 24.293
- 14.457

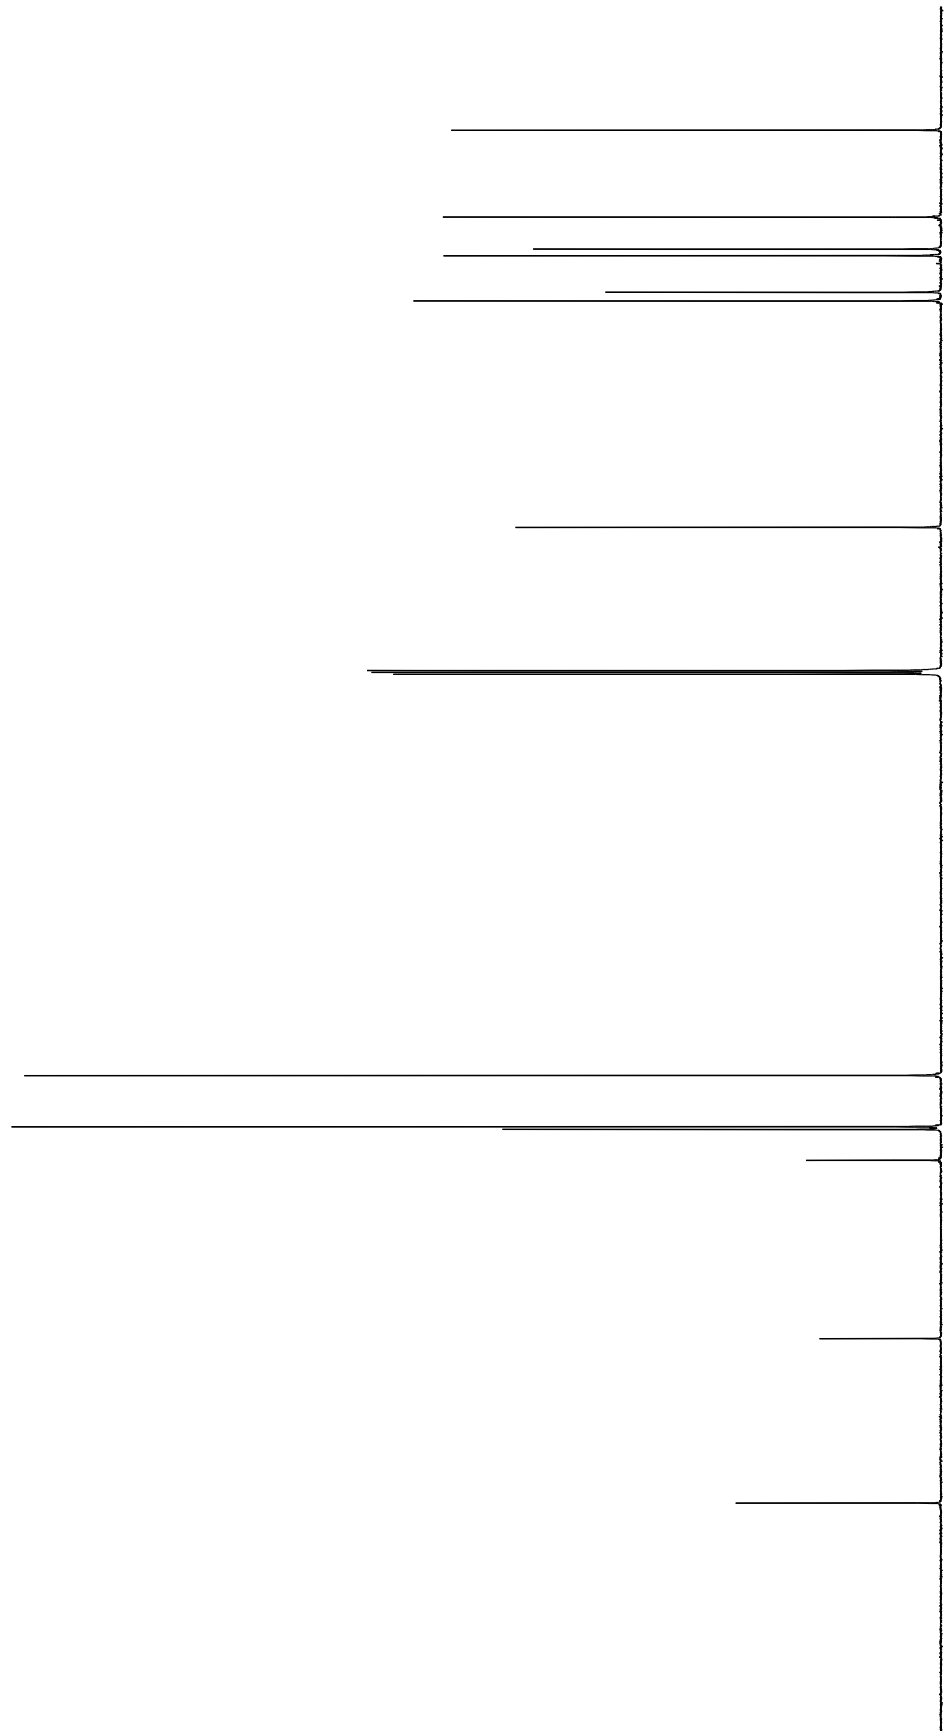

3.3 5-(Hex-5-enylsulfanyl)-1-phenyl-1(H)-tetrazole (8b)

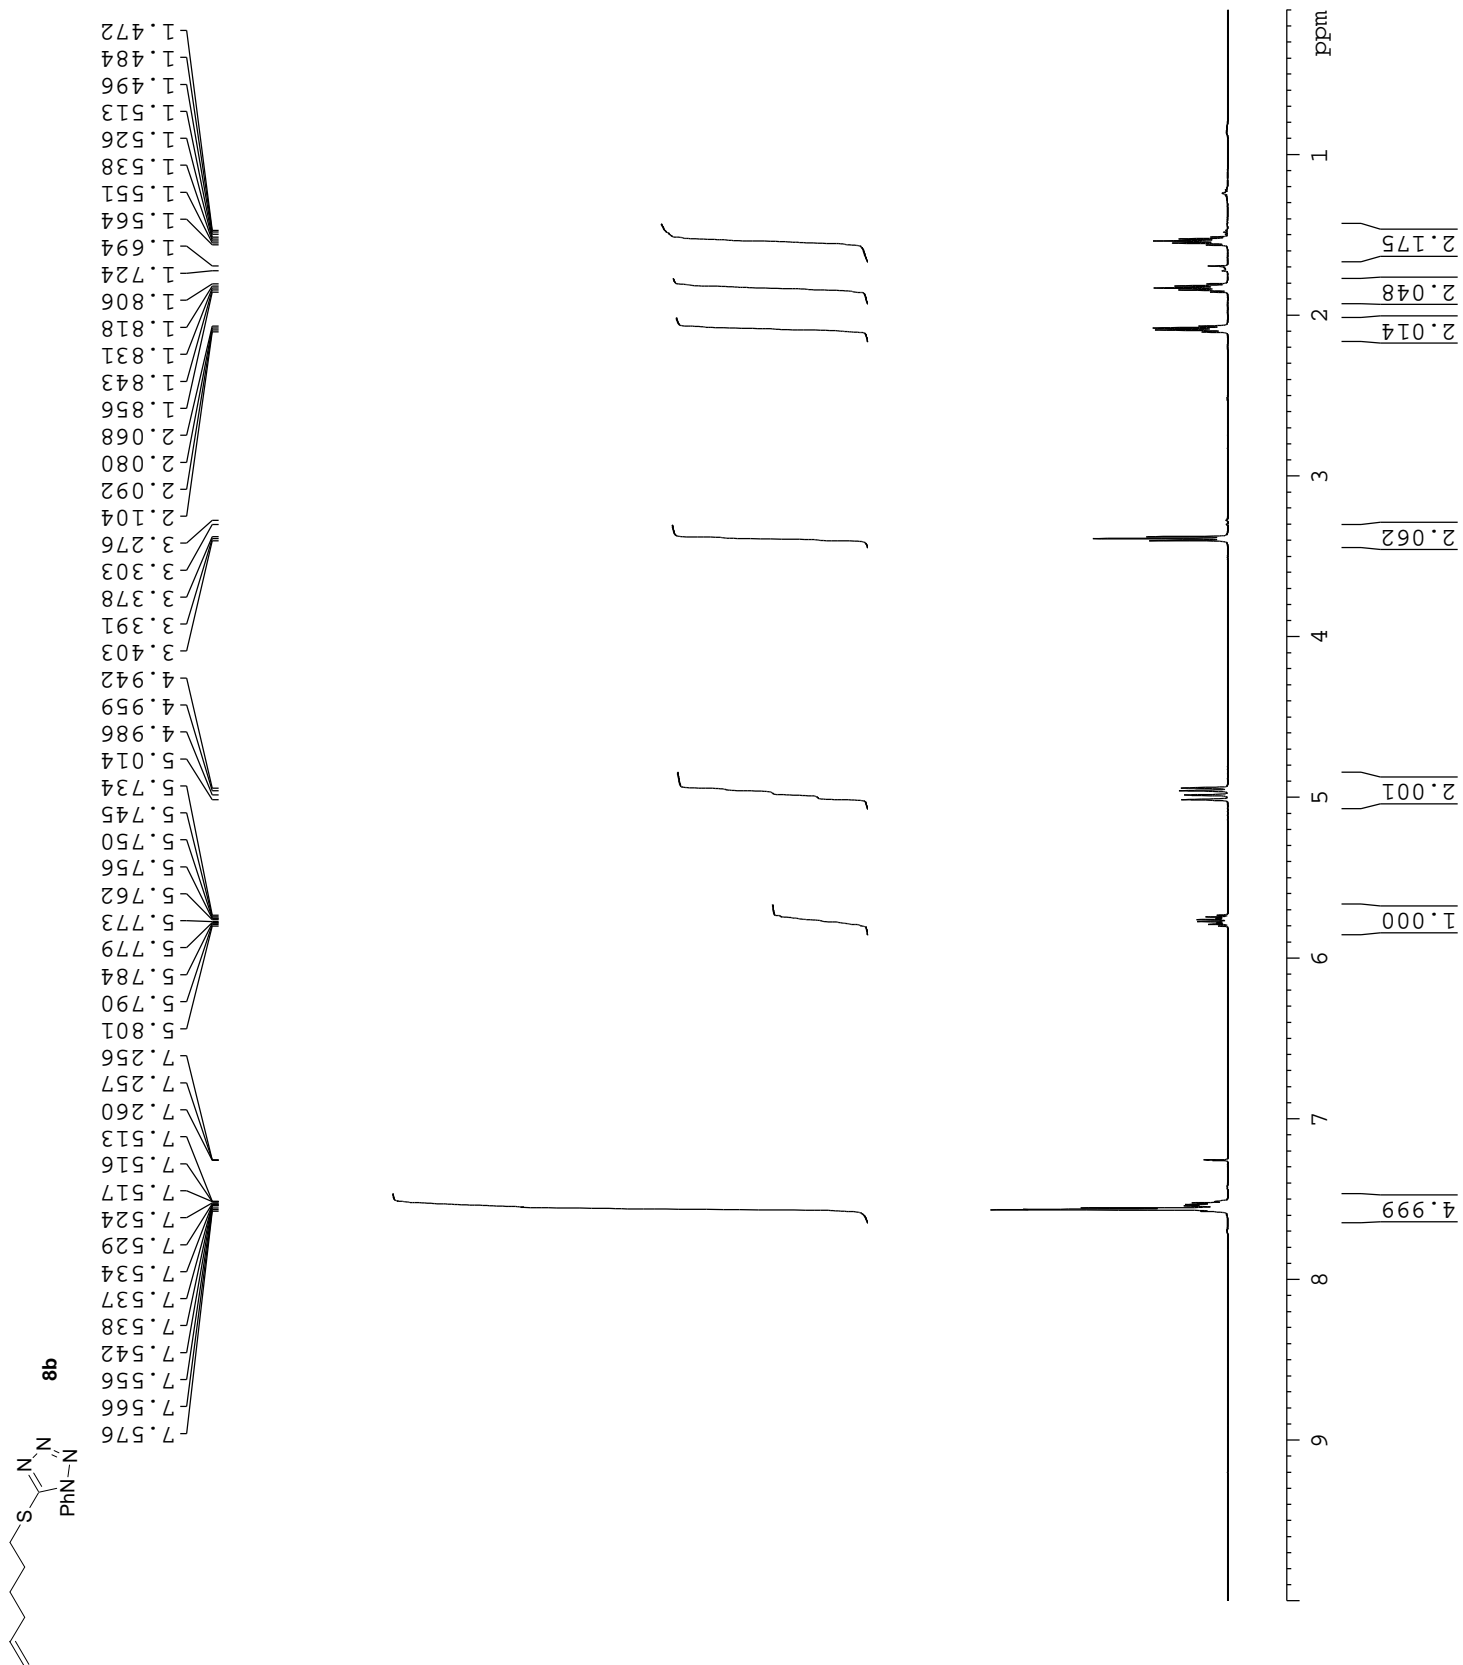

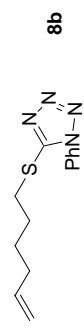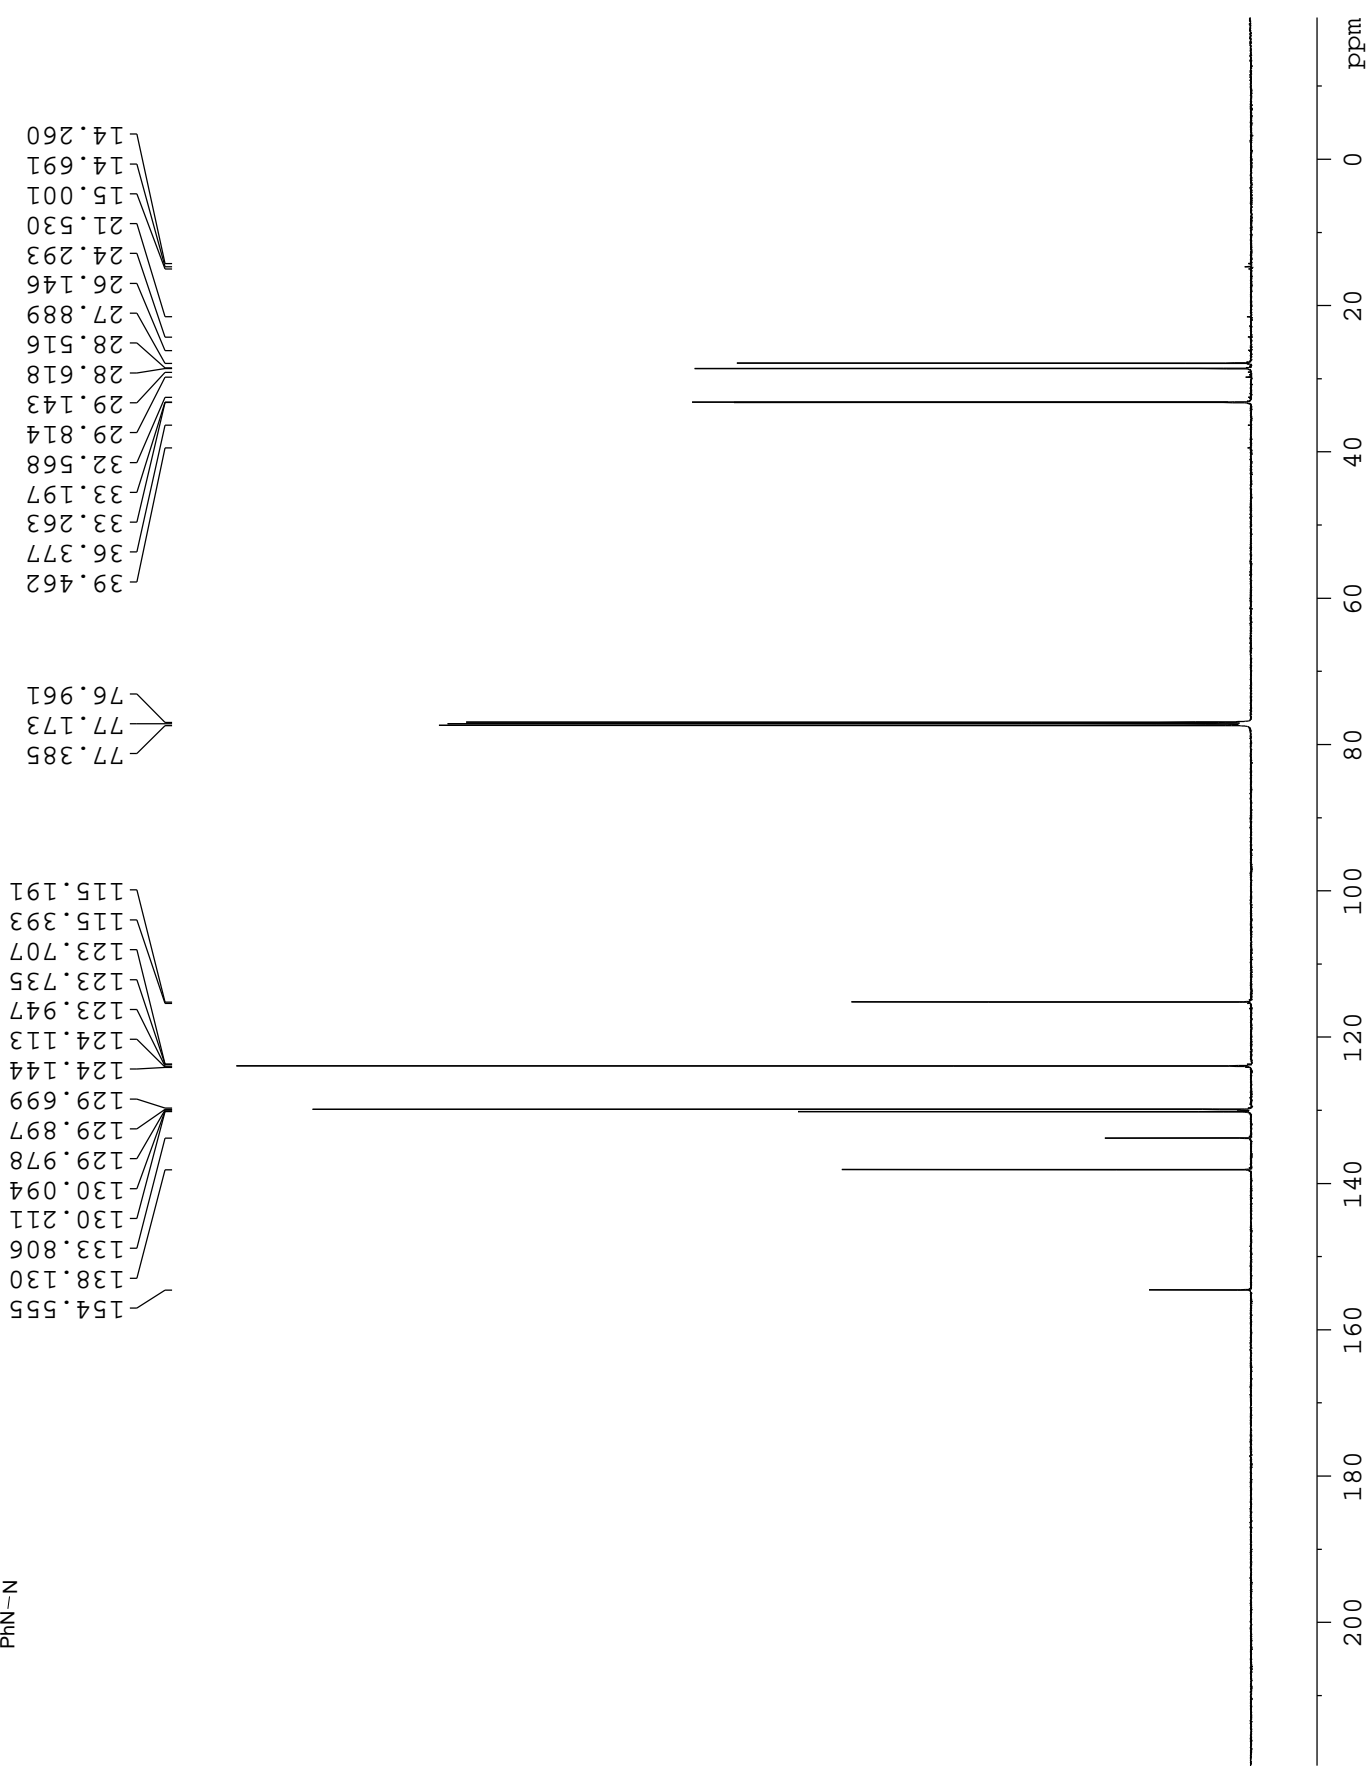

3.4 5-(3-Methylbut-3-enylsulfanyl)-1-phenyl-1(H)-tetrazole (8c)

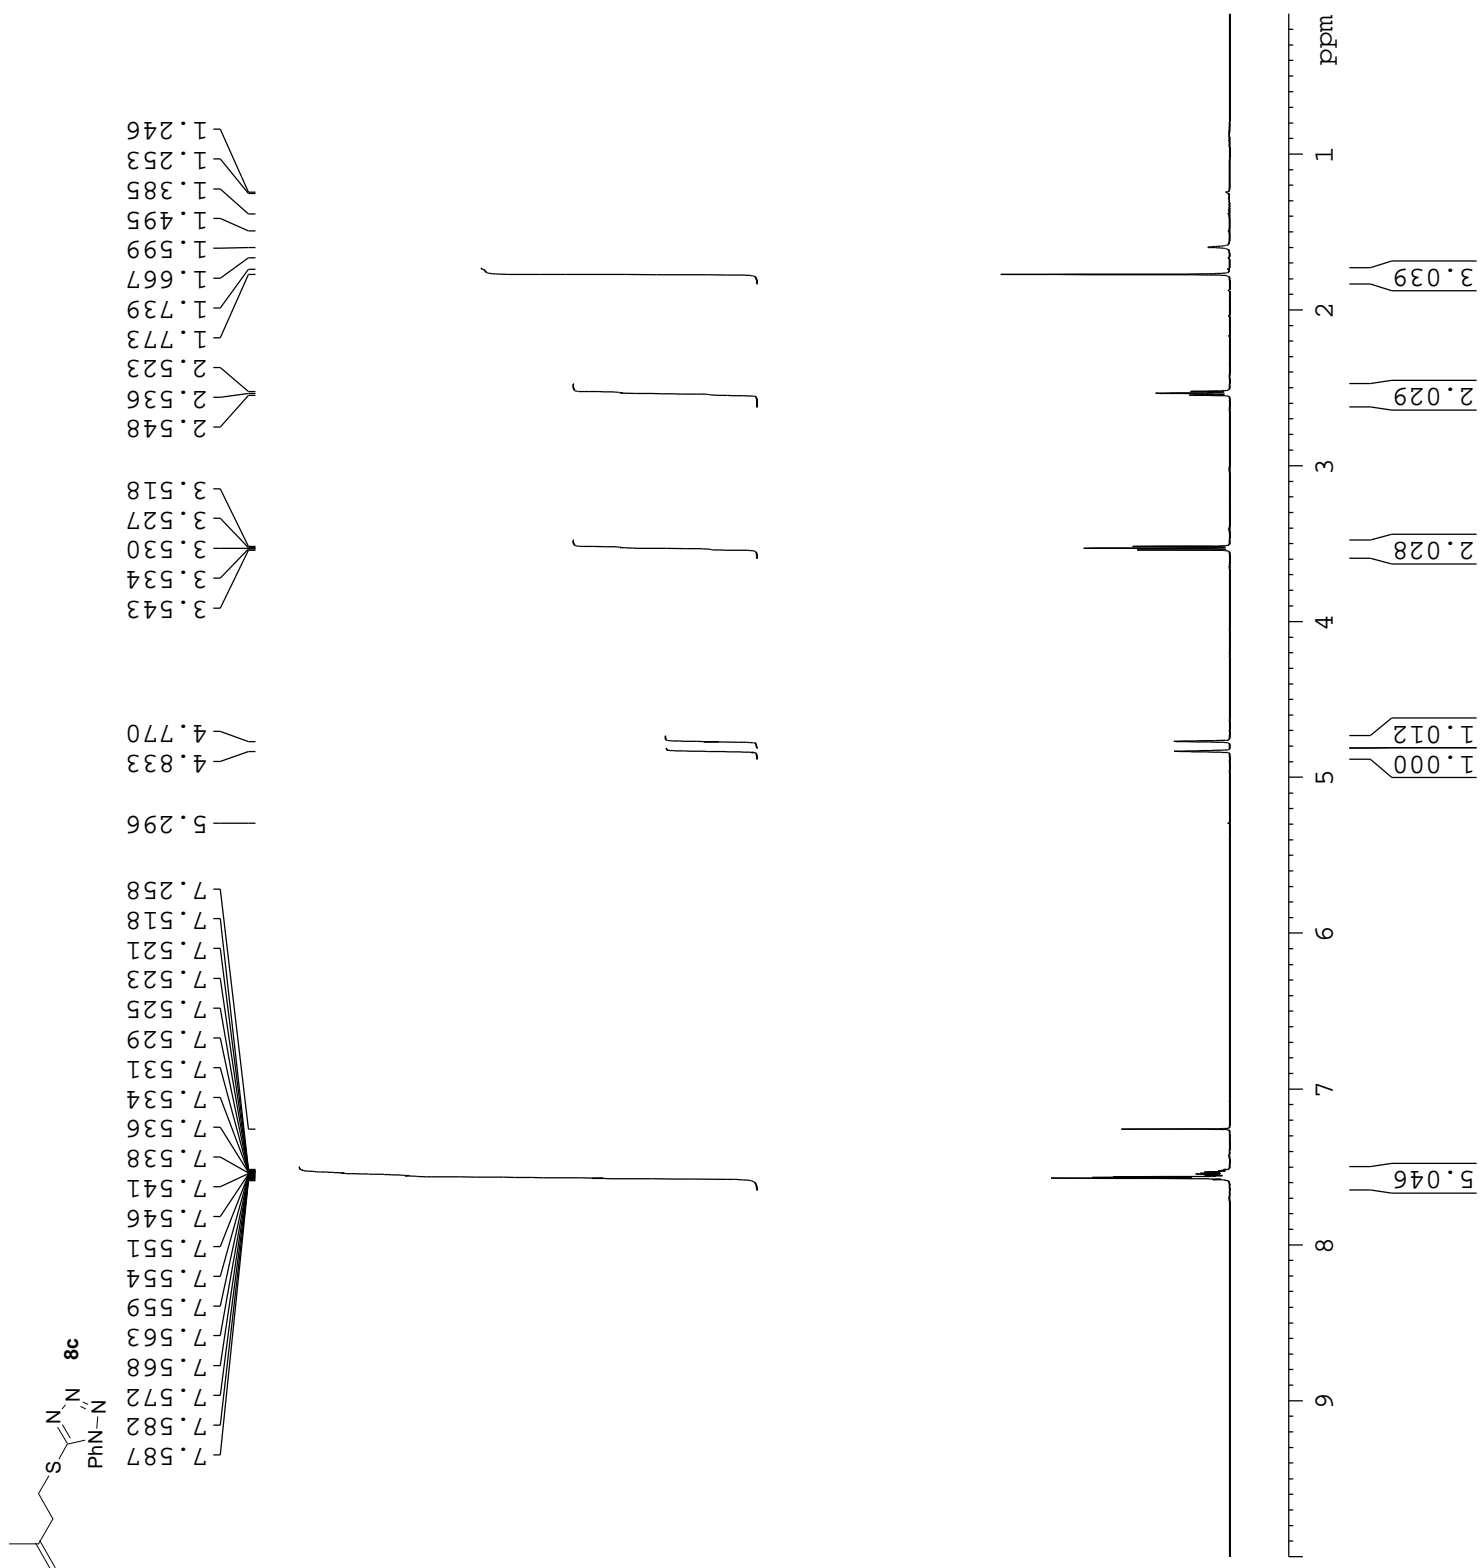

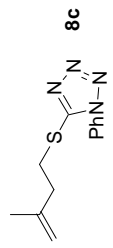

— 154.455  
— 142.622  
— 133.799  
— 130.218  
— 130.101  
— 129.911  
— 123.955  
— 112.608  
— 77.352  
— 77.140  
— 76.929  
— 36.968  
— 31.542  
— 22.208

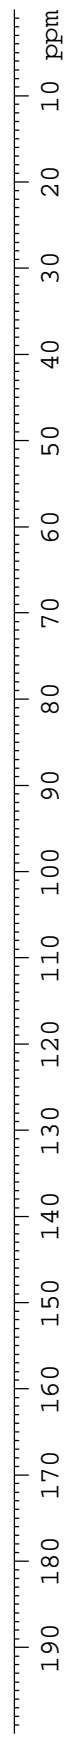



3.5 5-(2-Methylpropylsulfanyl)-1-phenyl-1(H)-tetrazole (8d)

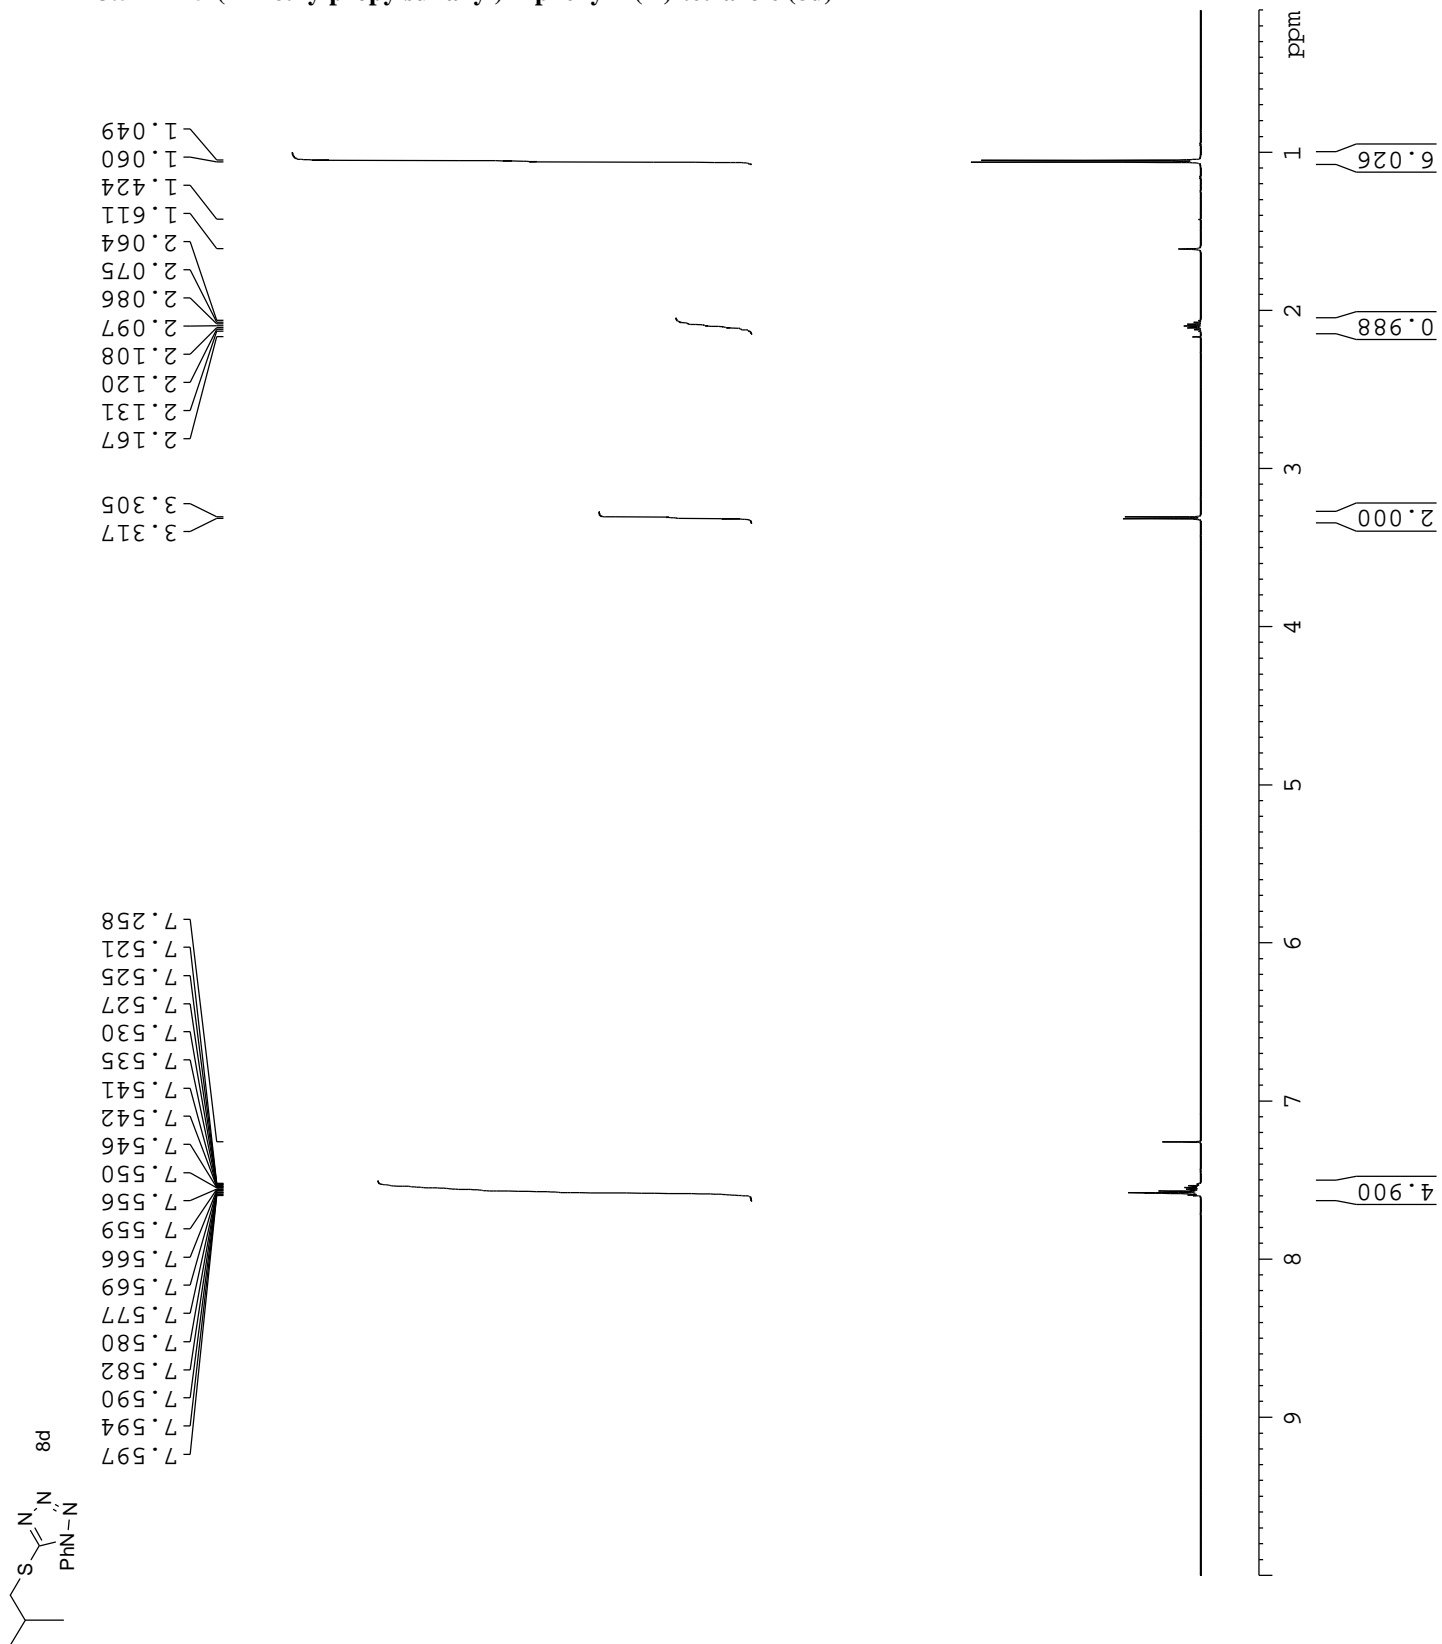

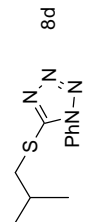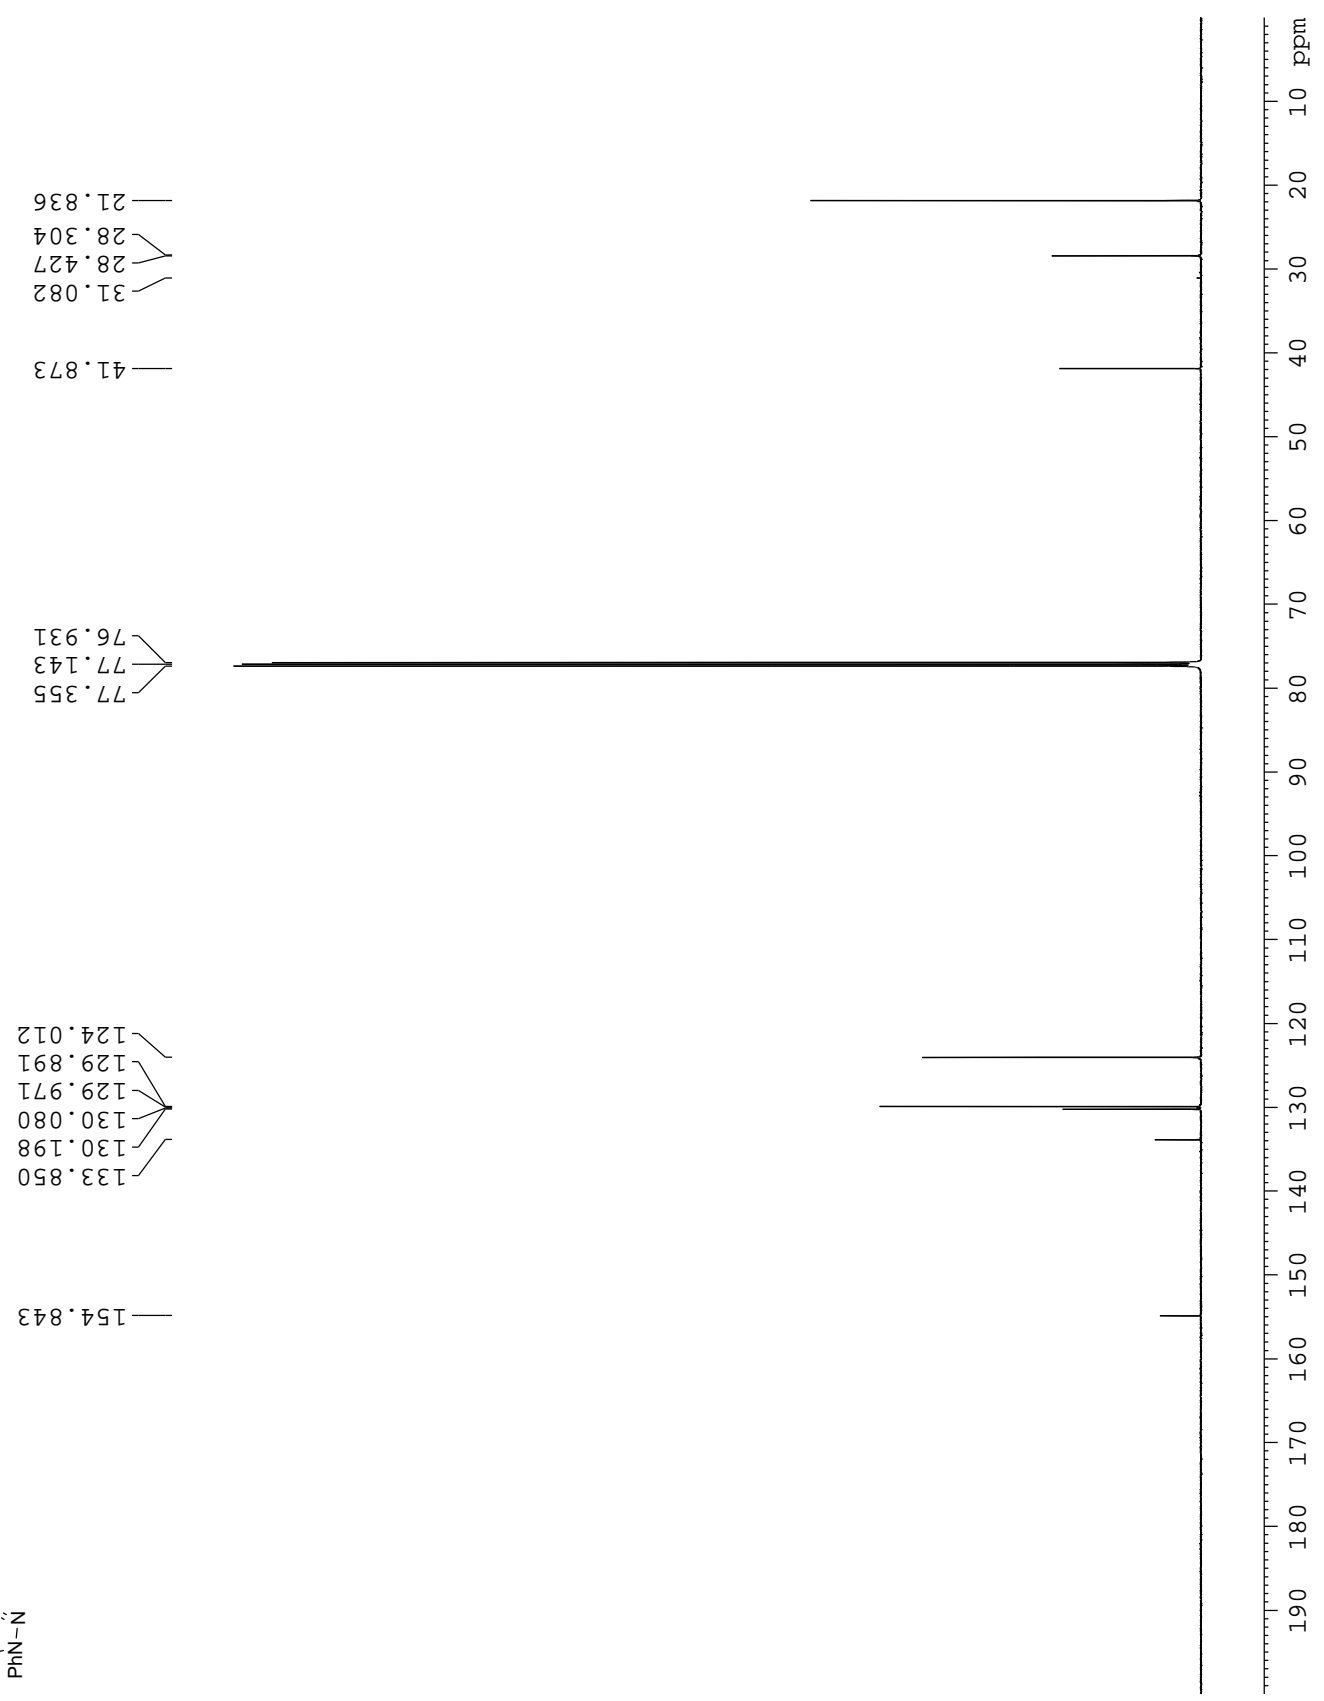



3.6 1-Phenyl-5-(4-phenylbutan-2-ylsulfanyl)-1(H)-tetrazole (8e)

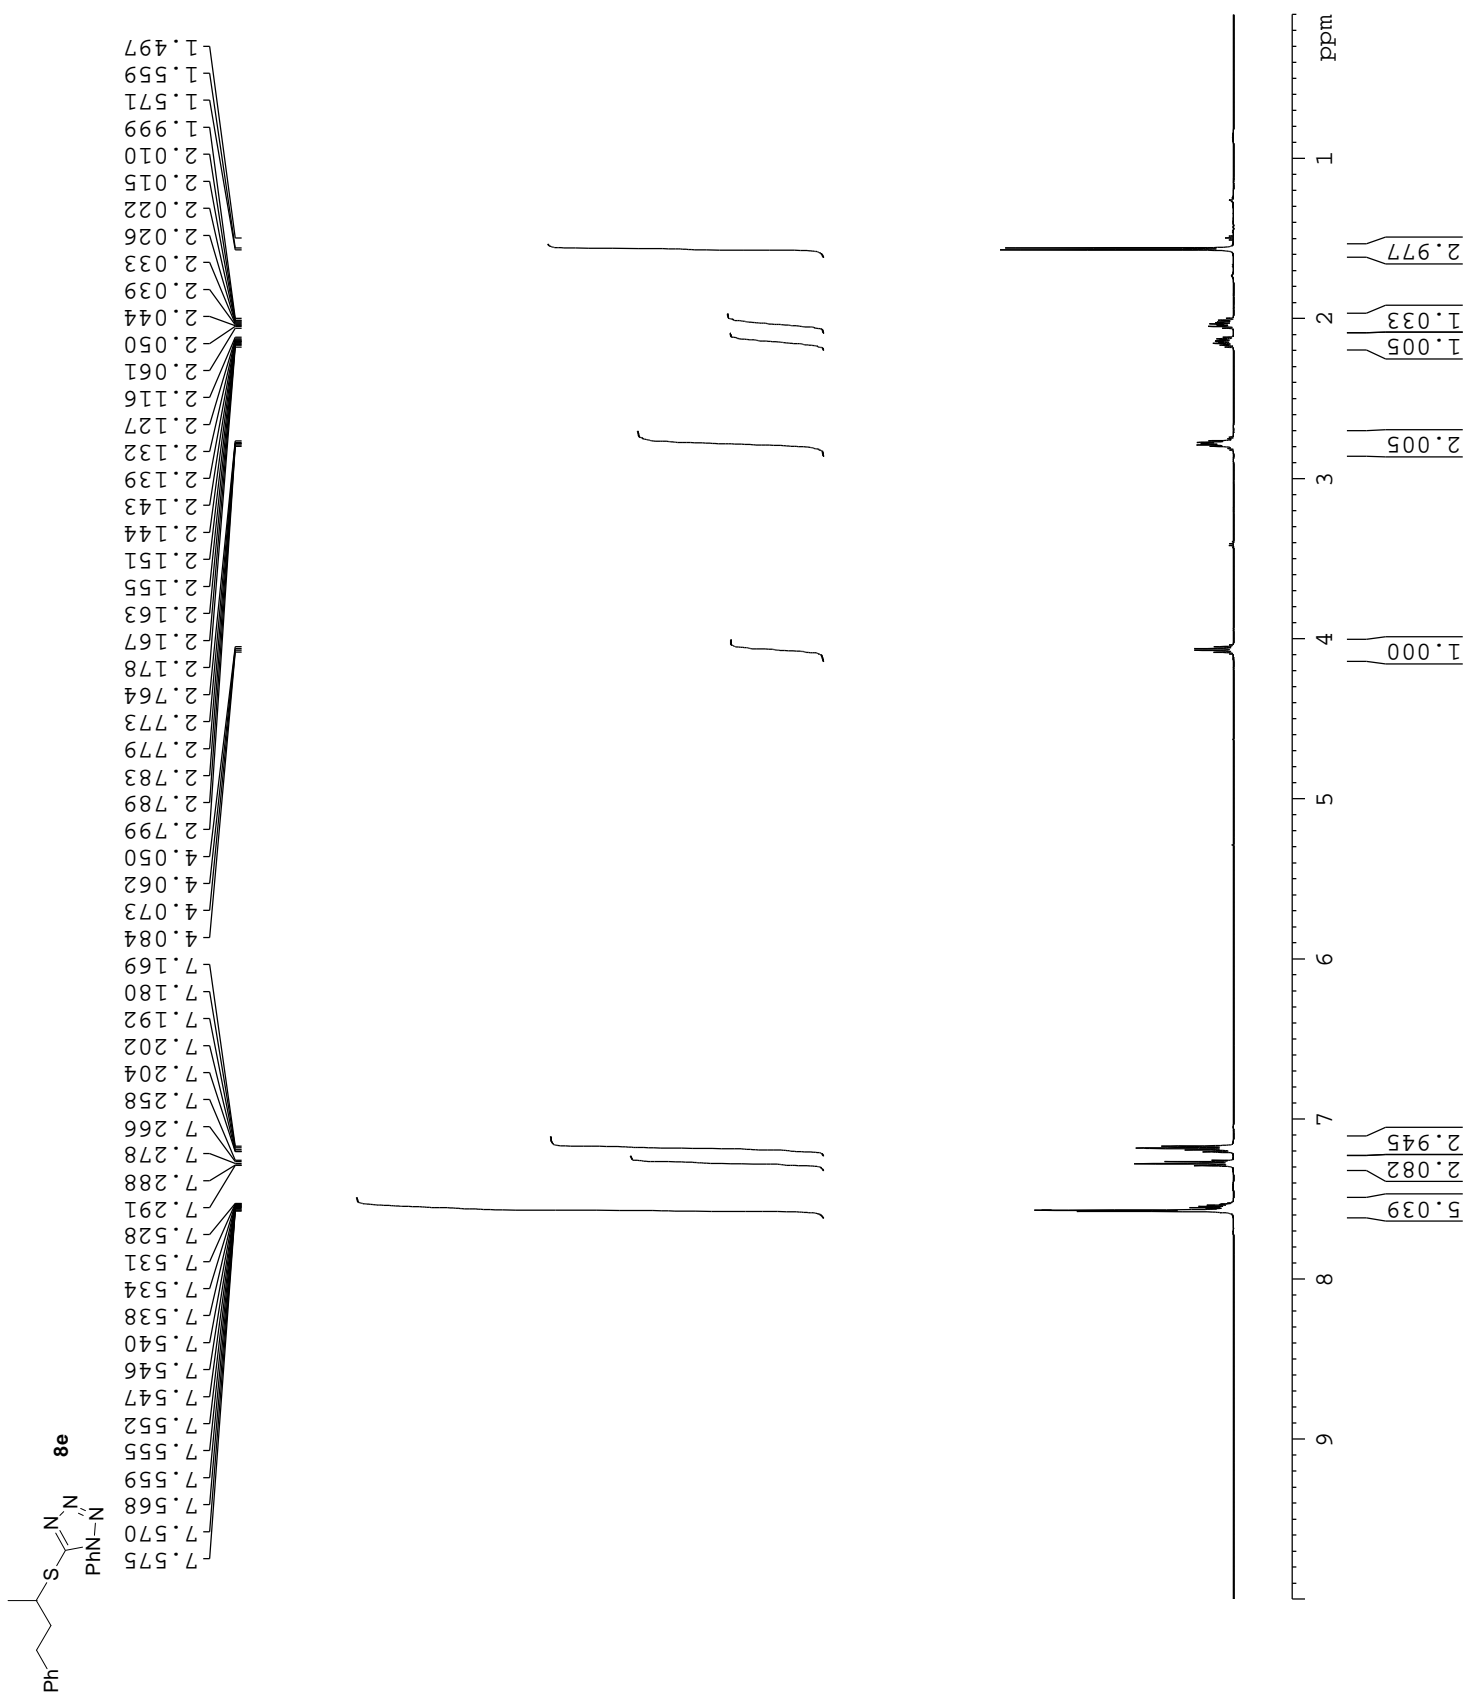

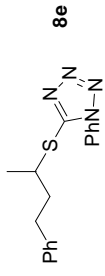

154.425  
154.022  
141.141  
140.969  
140.763  
133.847  
130.668  
130.253  
130.124  
130.058  
129.970  
129.910  
129.881  
129.680  
129.386  
128.826  
128.646  
128.558  
128.519  
128.468  
128.262  
126.441  
126.288  
126.072  
124.588  
124.355  
124.320  
124.158  
123.961  
123.918  
77.424  
77.212  
77.001  
60.534  
44.579  
44.464  
44.345  
38.442  
38.339  
38.218  
37.418  
33.292  
33.169  
33.139  
29.836  
27.866  
22.835  
21.733  
21.625  
14.719  
14.347

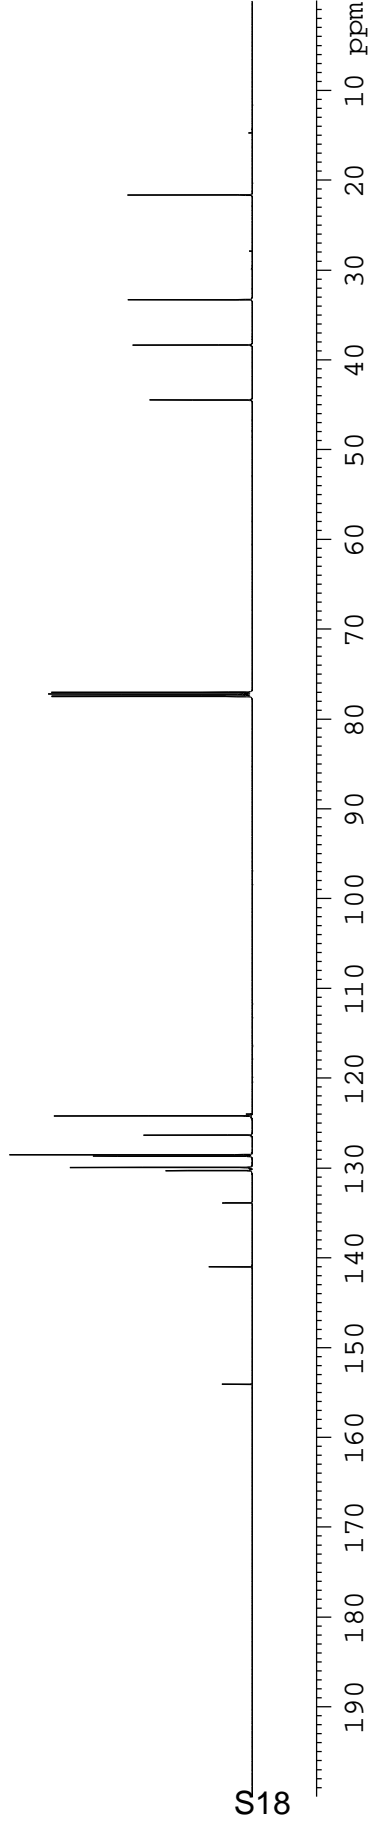

3.7 3-{Phenyl[2-(1-phenyl-1(H)-tetrazol-5-ylsulfanyl)ethyl]amino}propanenitrile (8f)

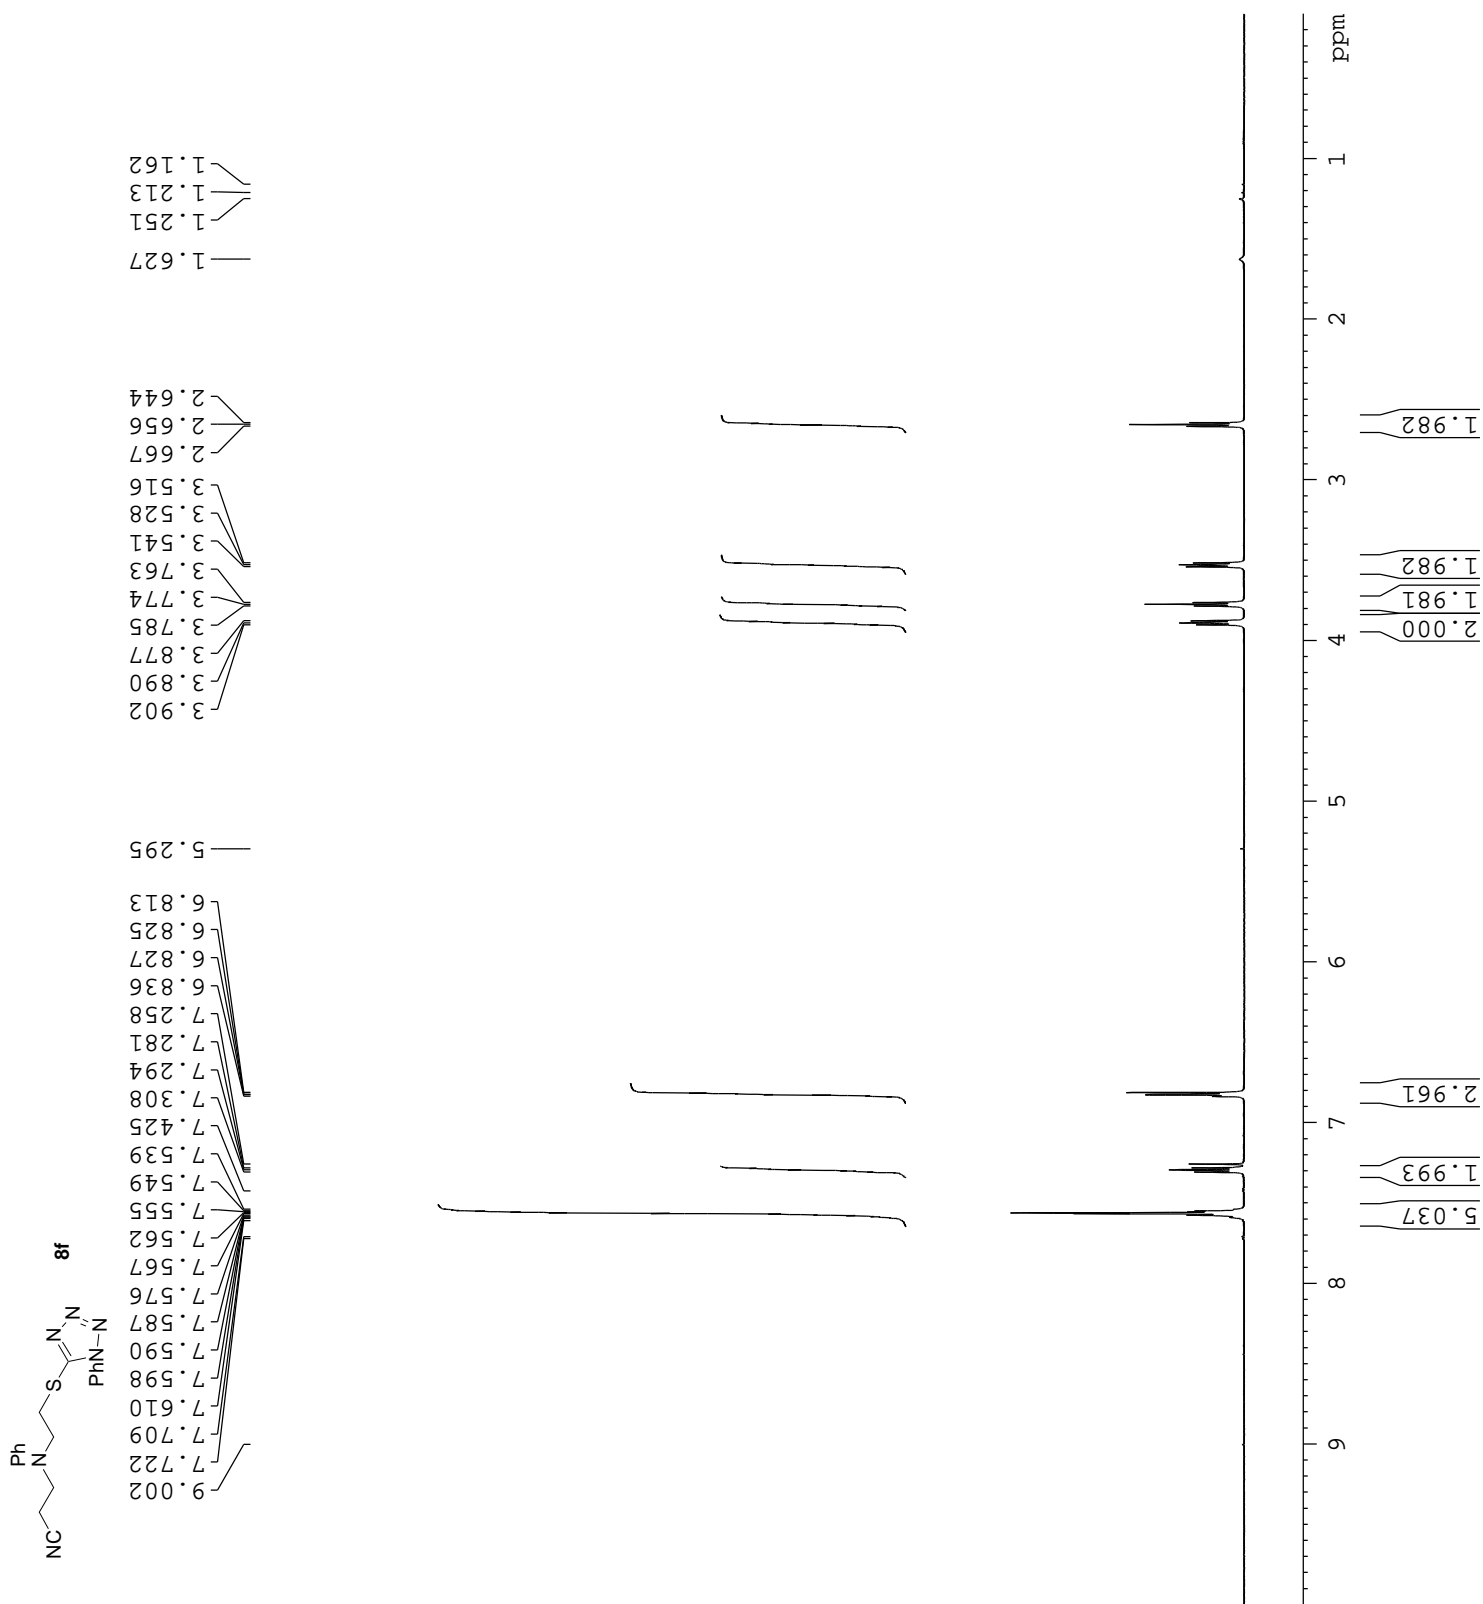

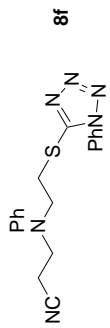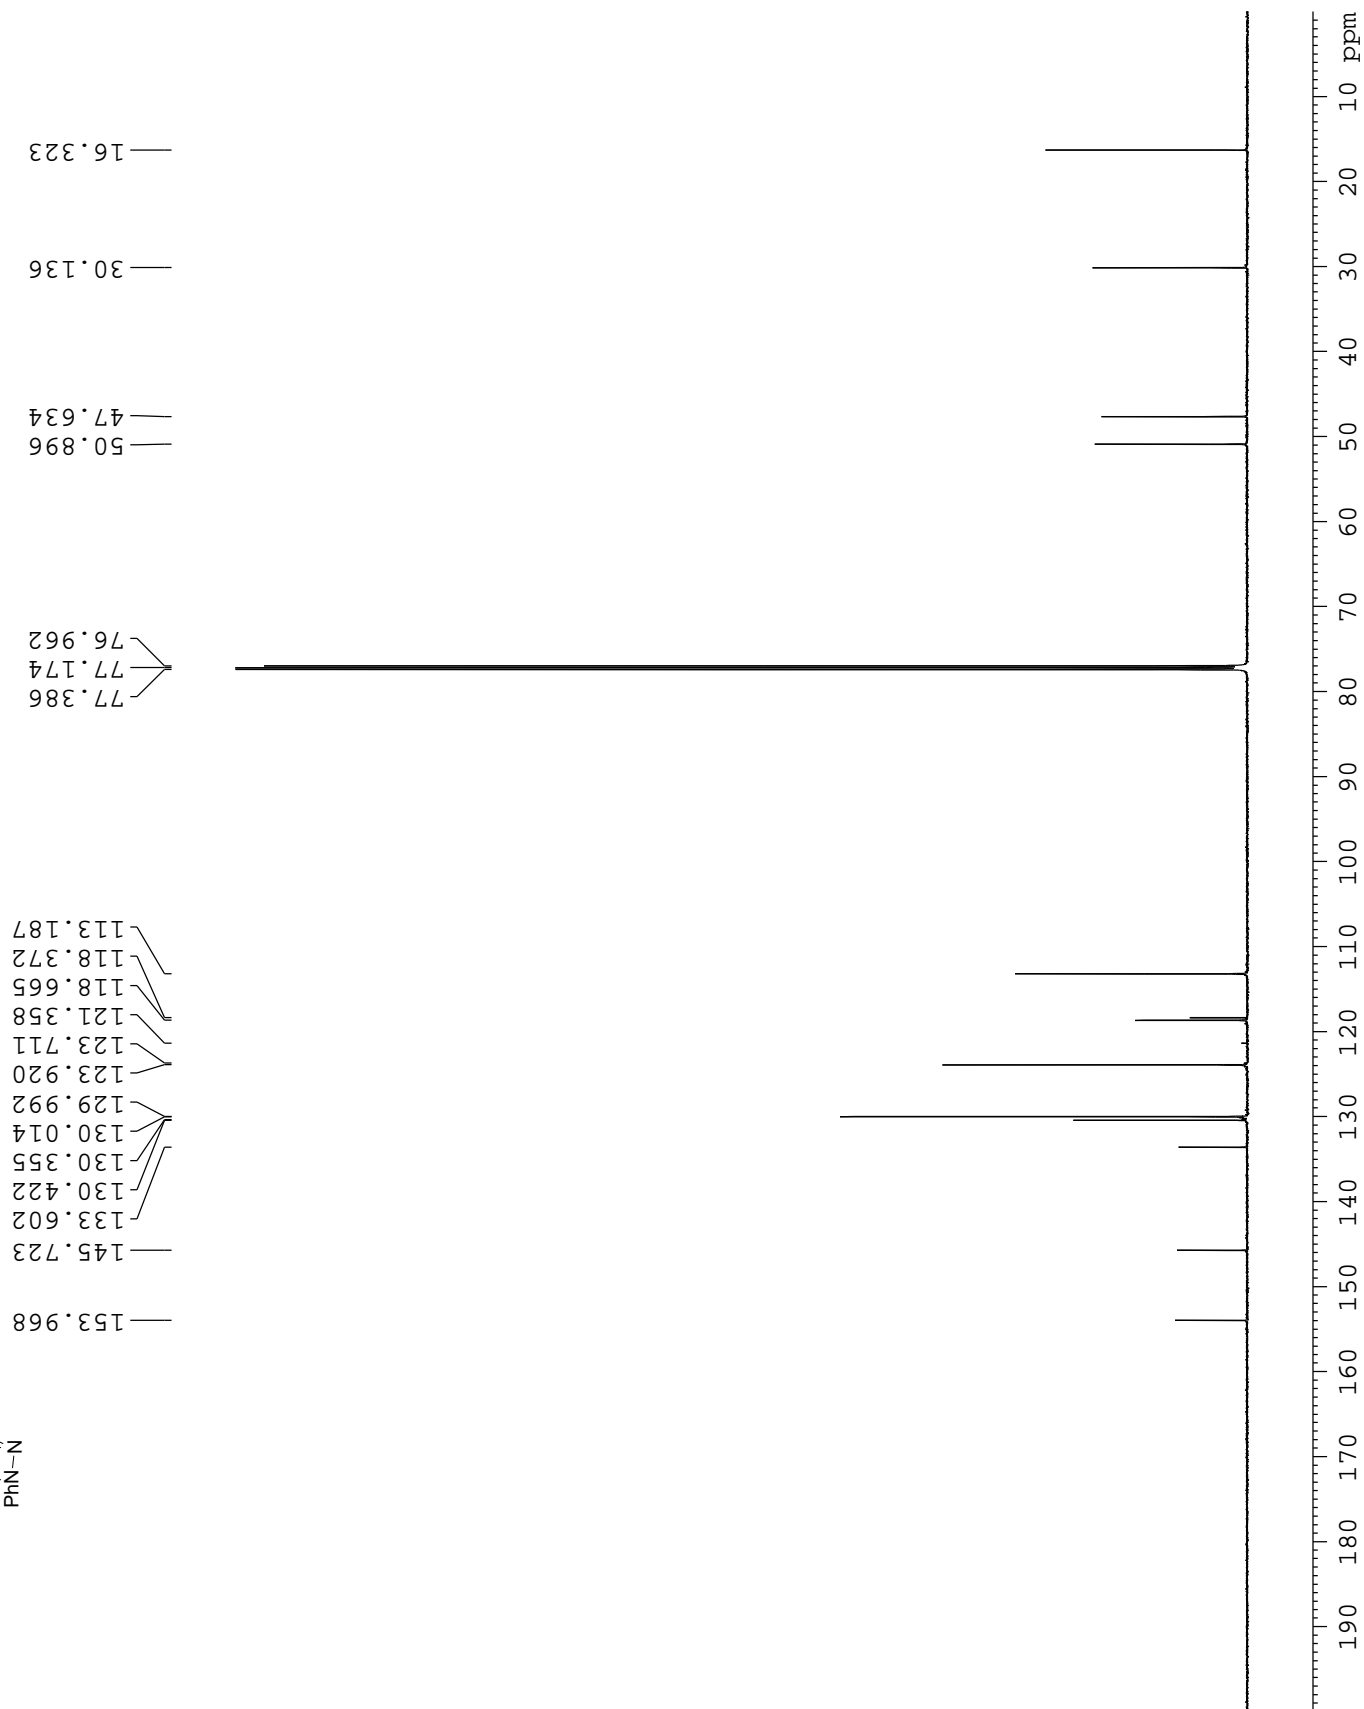

3.8 1-Phenyl-5-[2-(tetrahydro-2(H)-pyran-2-yloxy)ethylsulfanyl]-1(H)-tetrazole (8g)

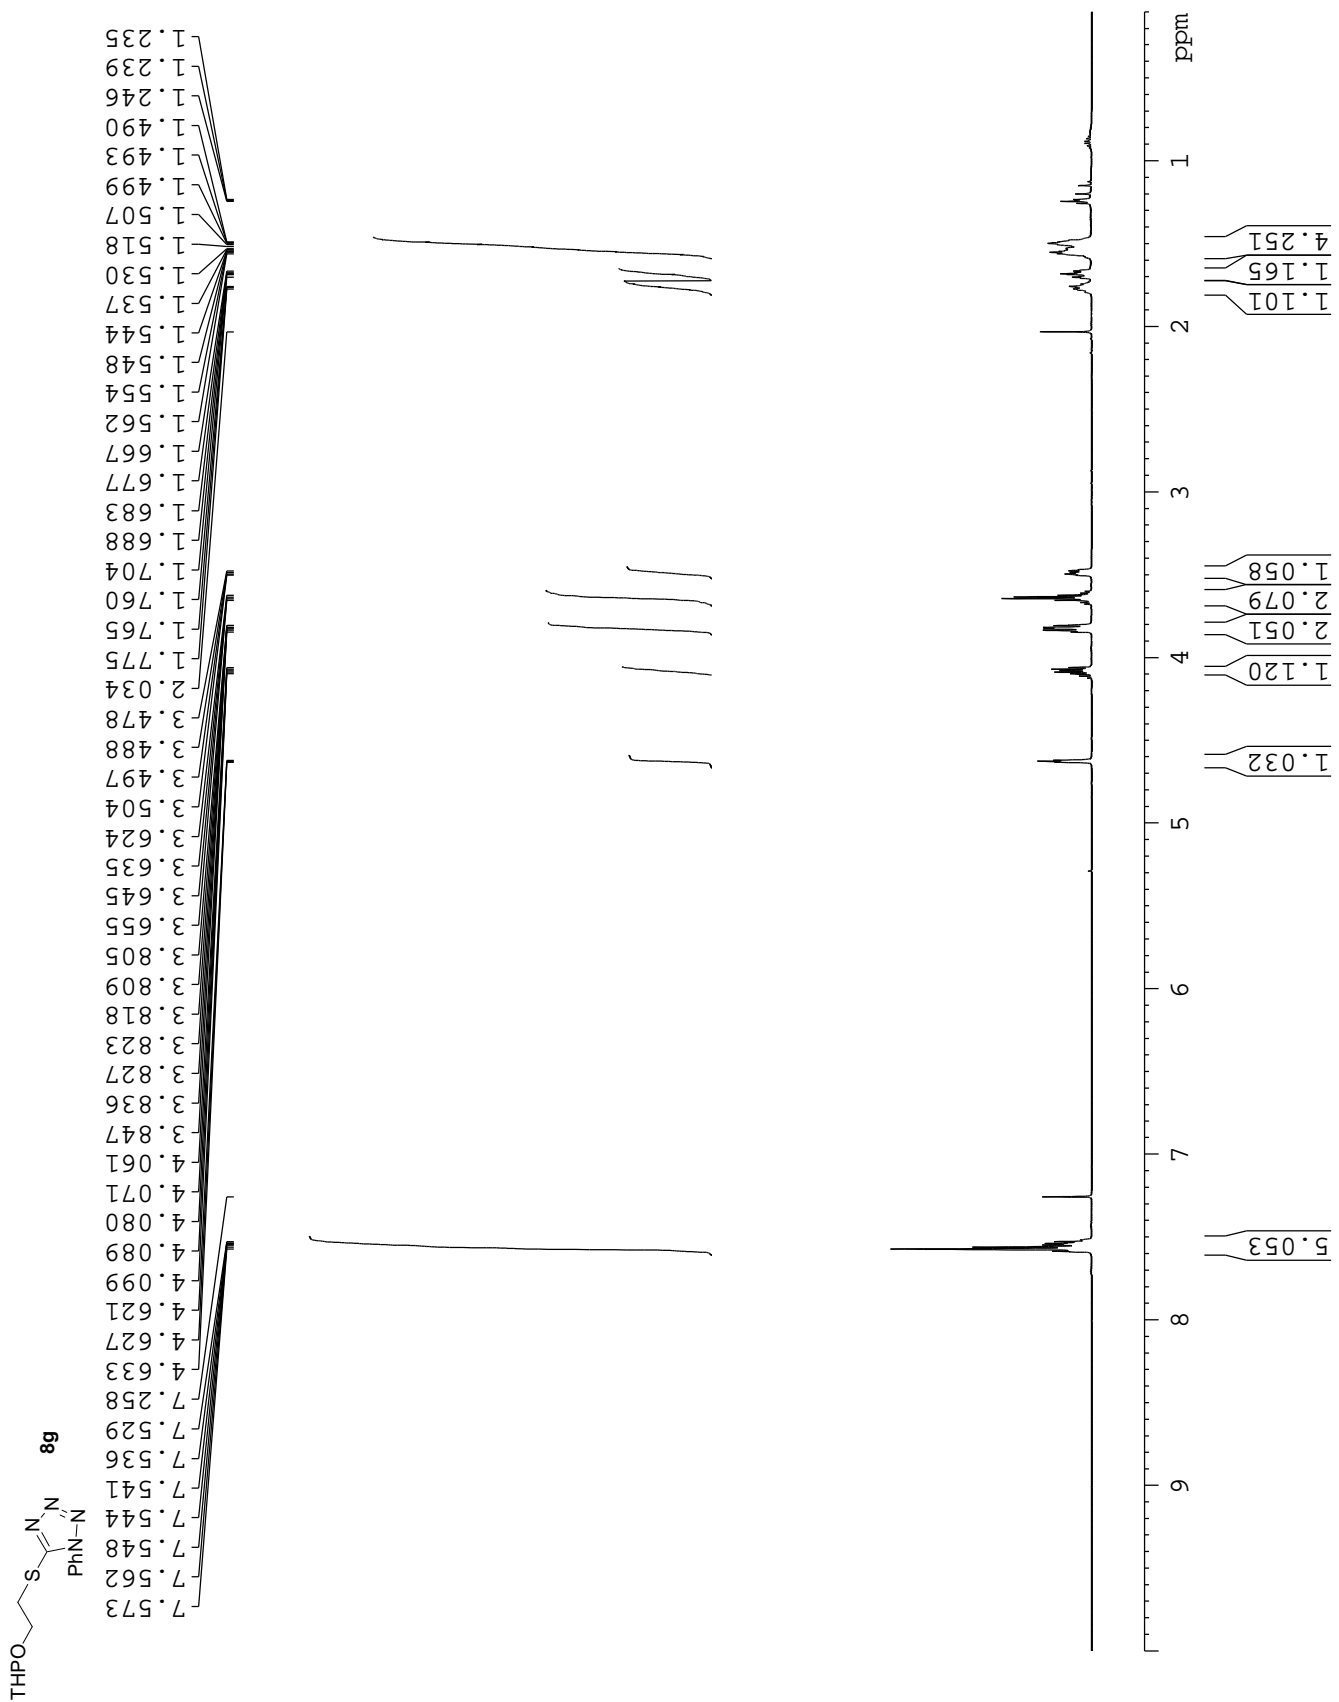

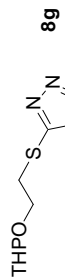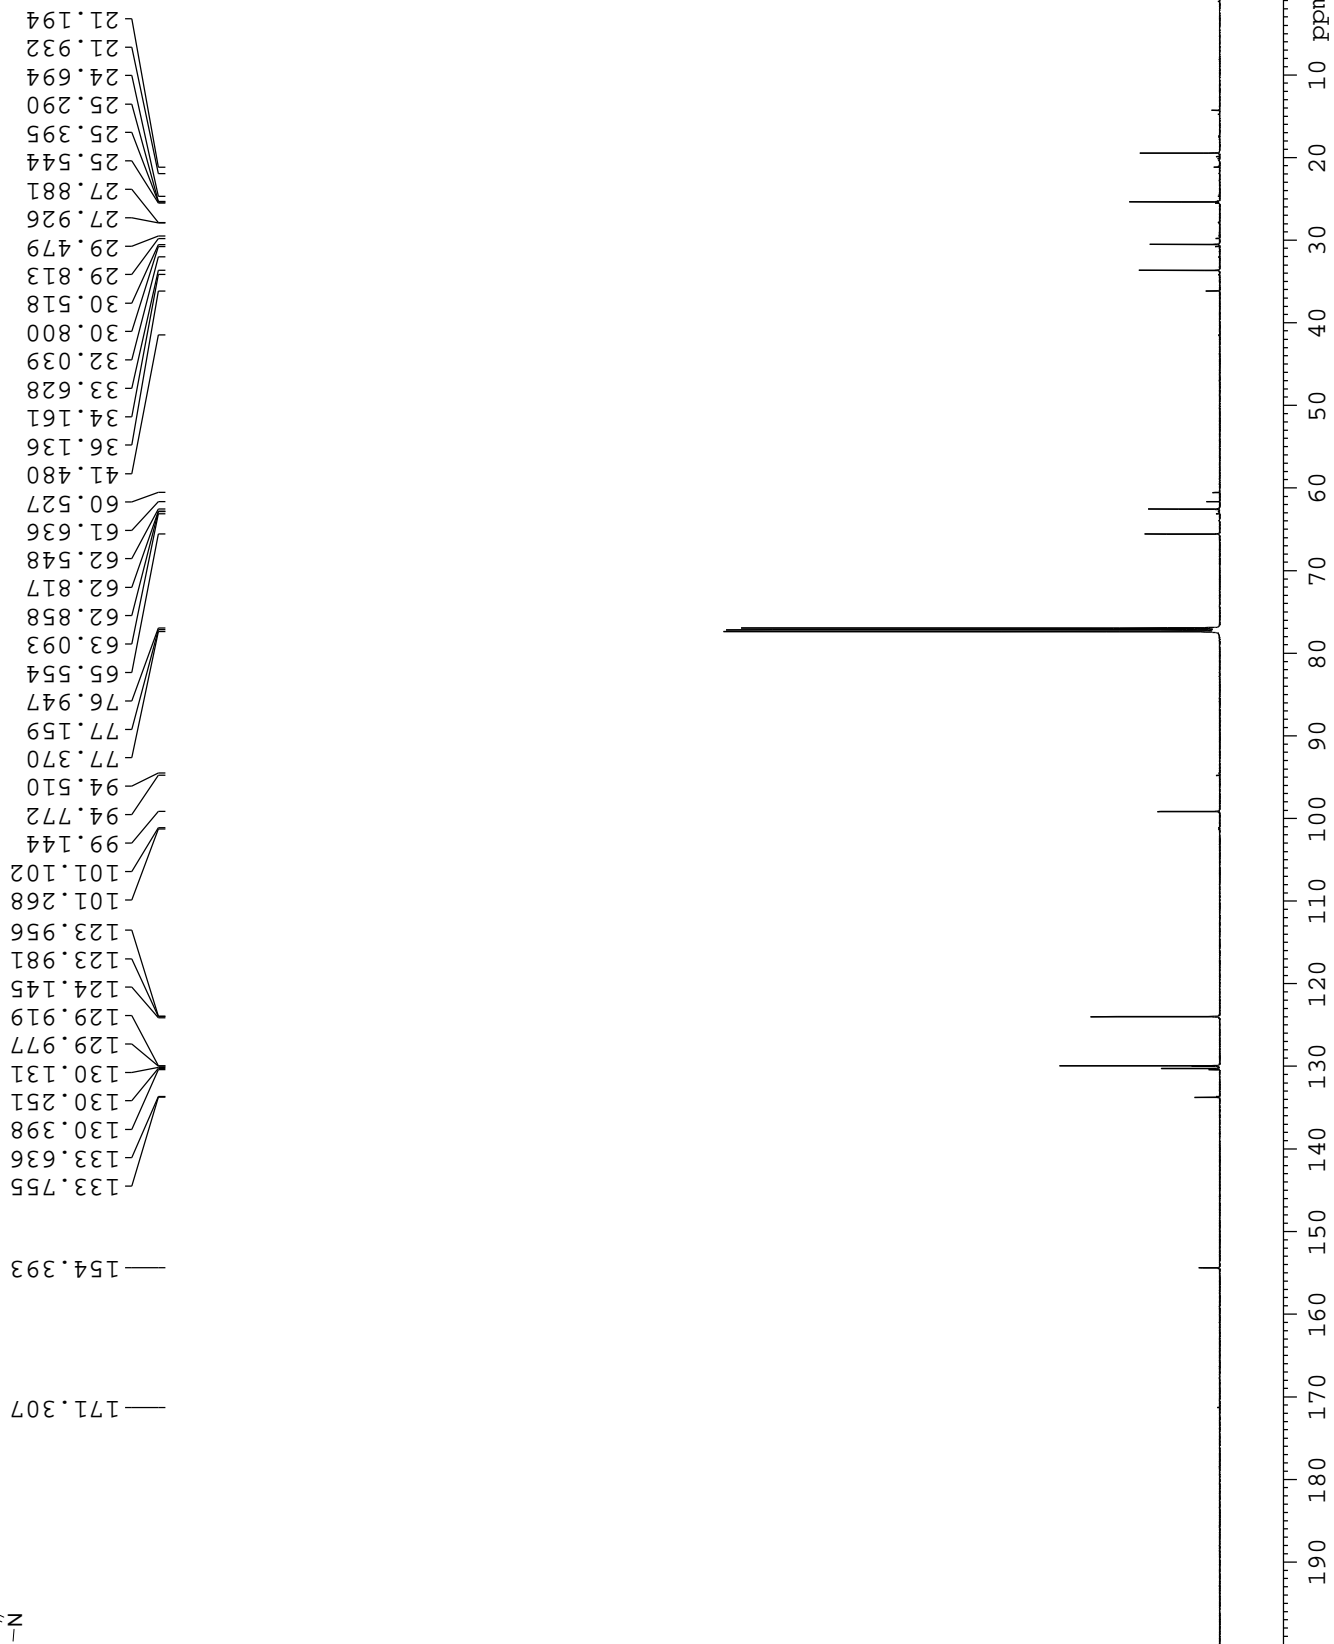

3.9 1-Phenyl-5-(tetrahydro-2(H)-pyran-2-ylsulfanyl)-1(H)-tetrazole (9)

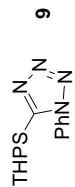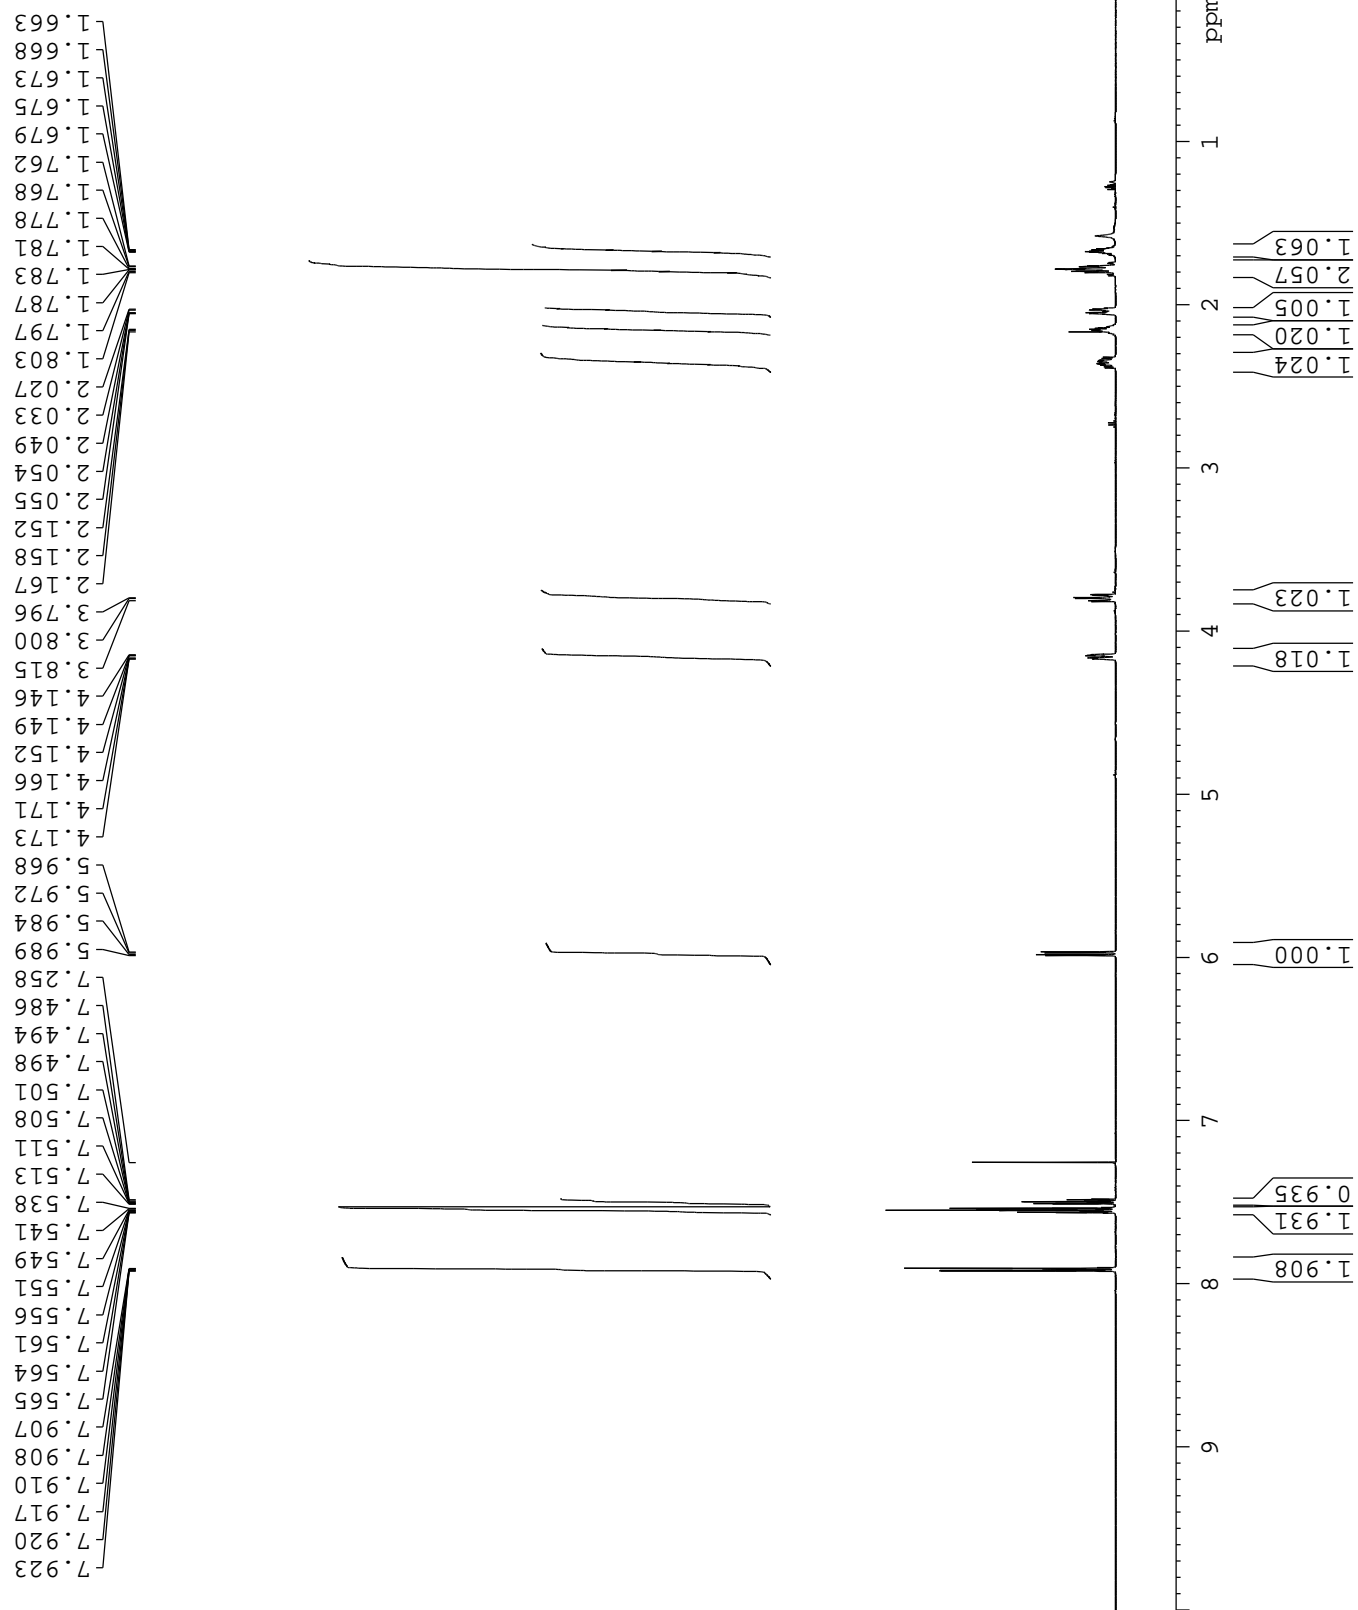

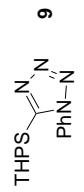

31.512  
31.089  
29.820  
29.055  
26.097  
25.570  
25.335  
24.761  
22.329  
15.222  
14.492

83.520  
77.359  
77.148  
76.936  
68.527

134.617  
129.836  
129.700  
129.484  
129.384  
124.180

163.748

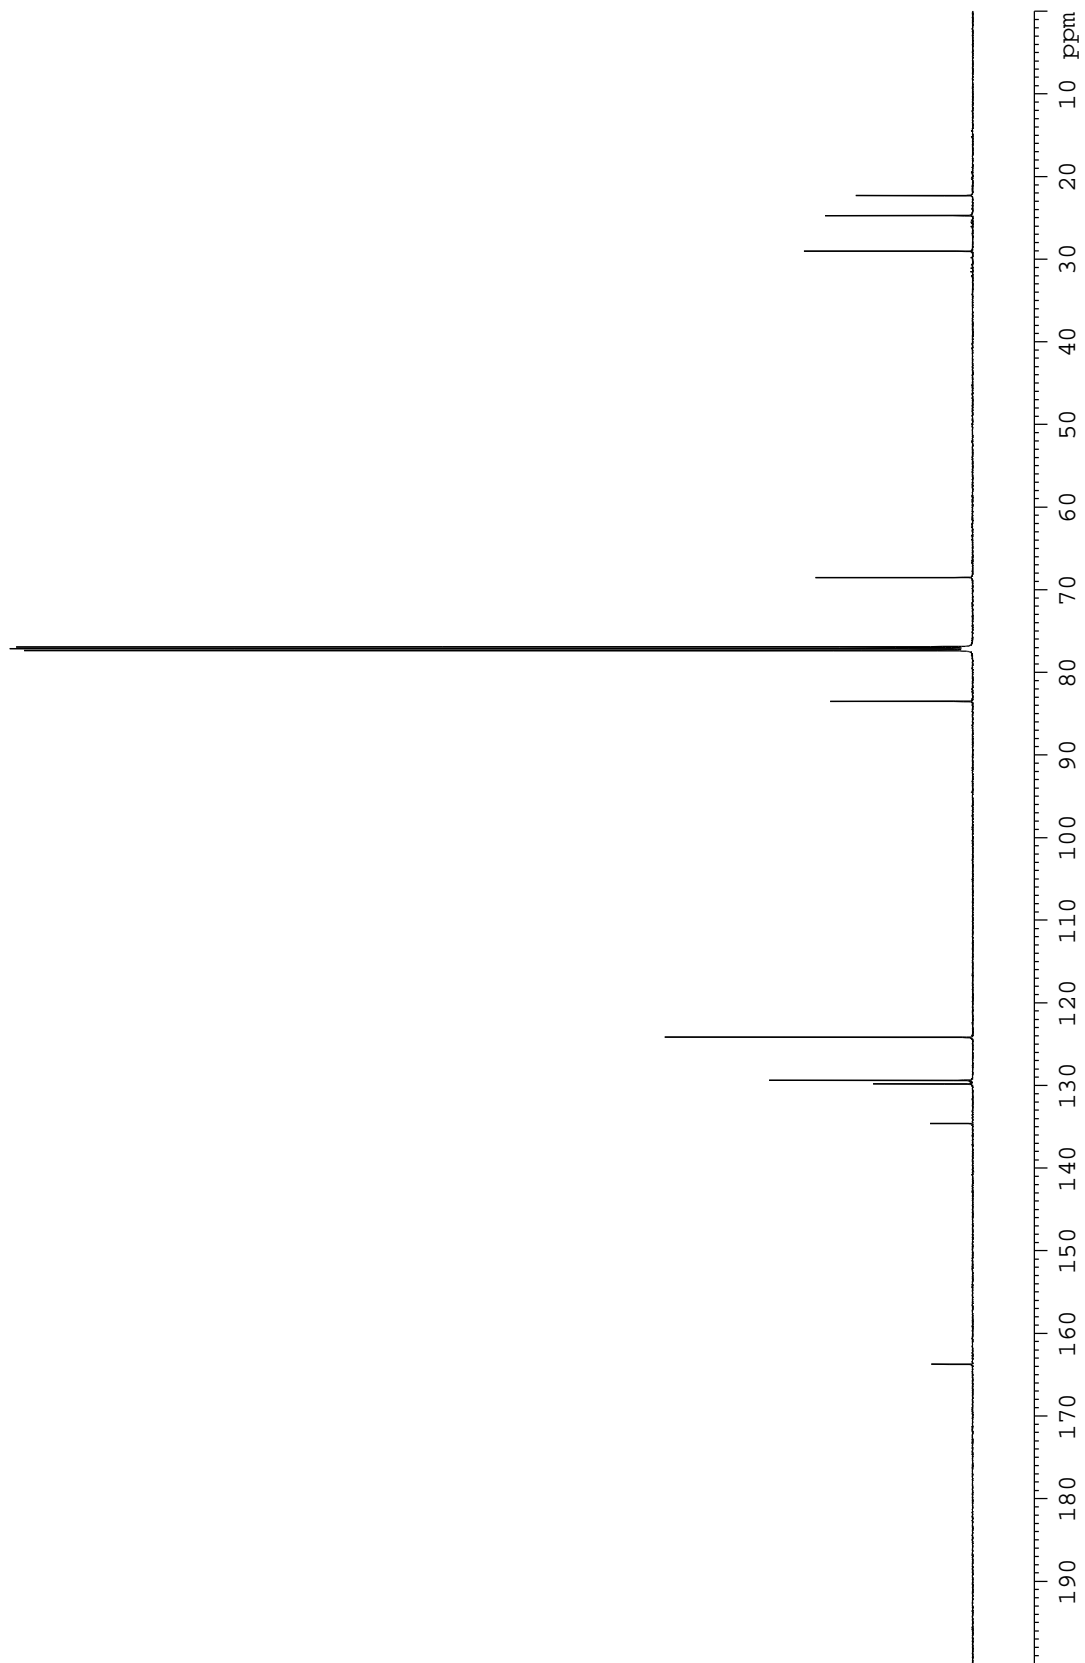



3.10 *tert*-Butyl 3-(1-phenyl-1(*H*)-tetrazol-5-ylsulfanyl)propylcarbamate (8h)

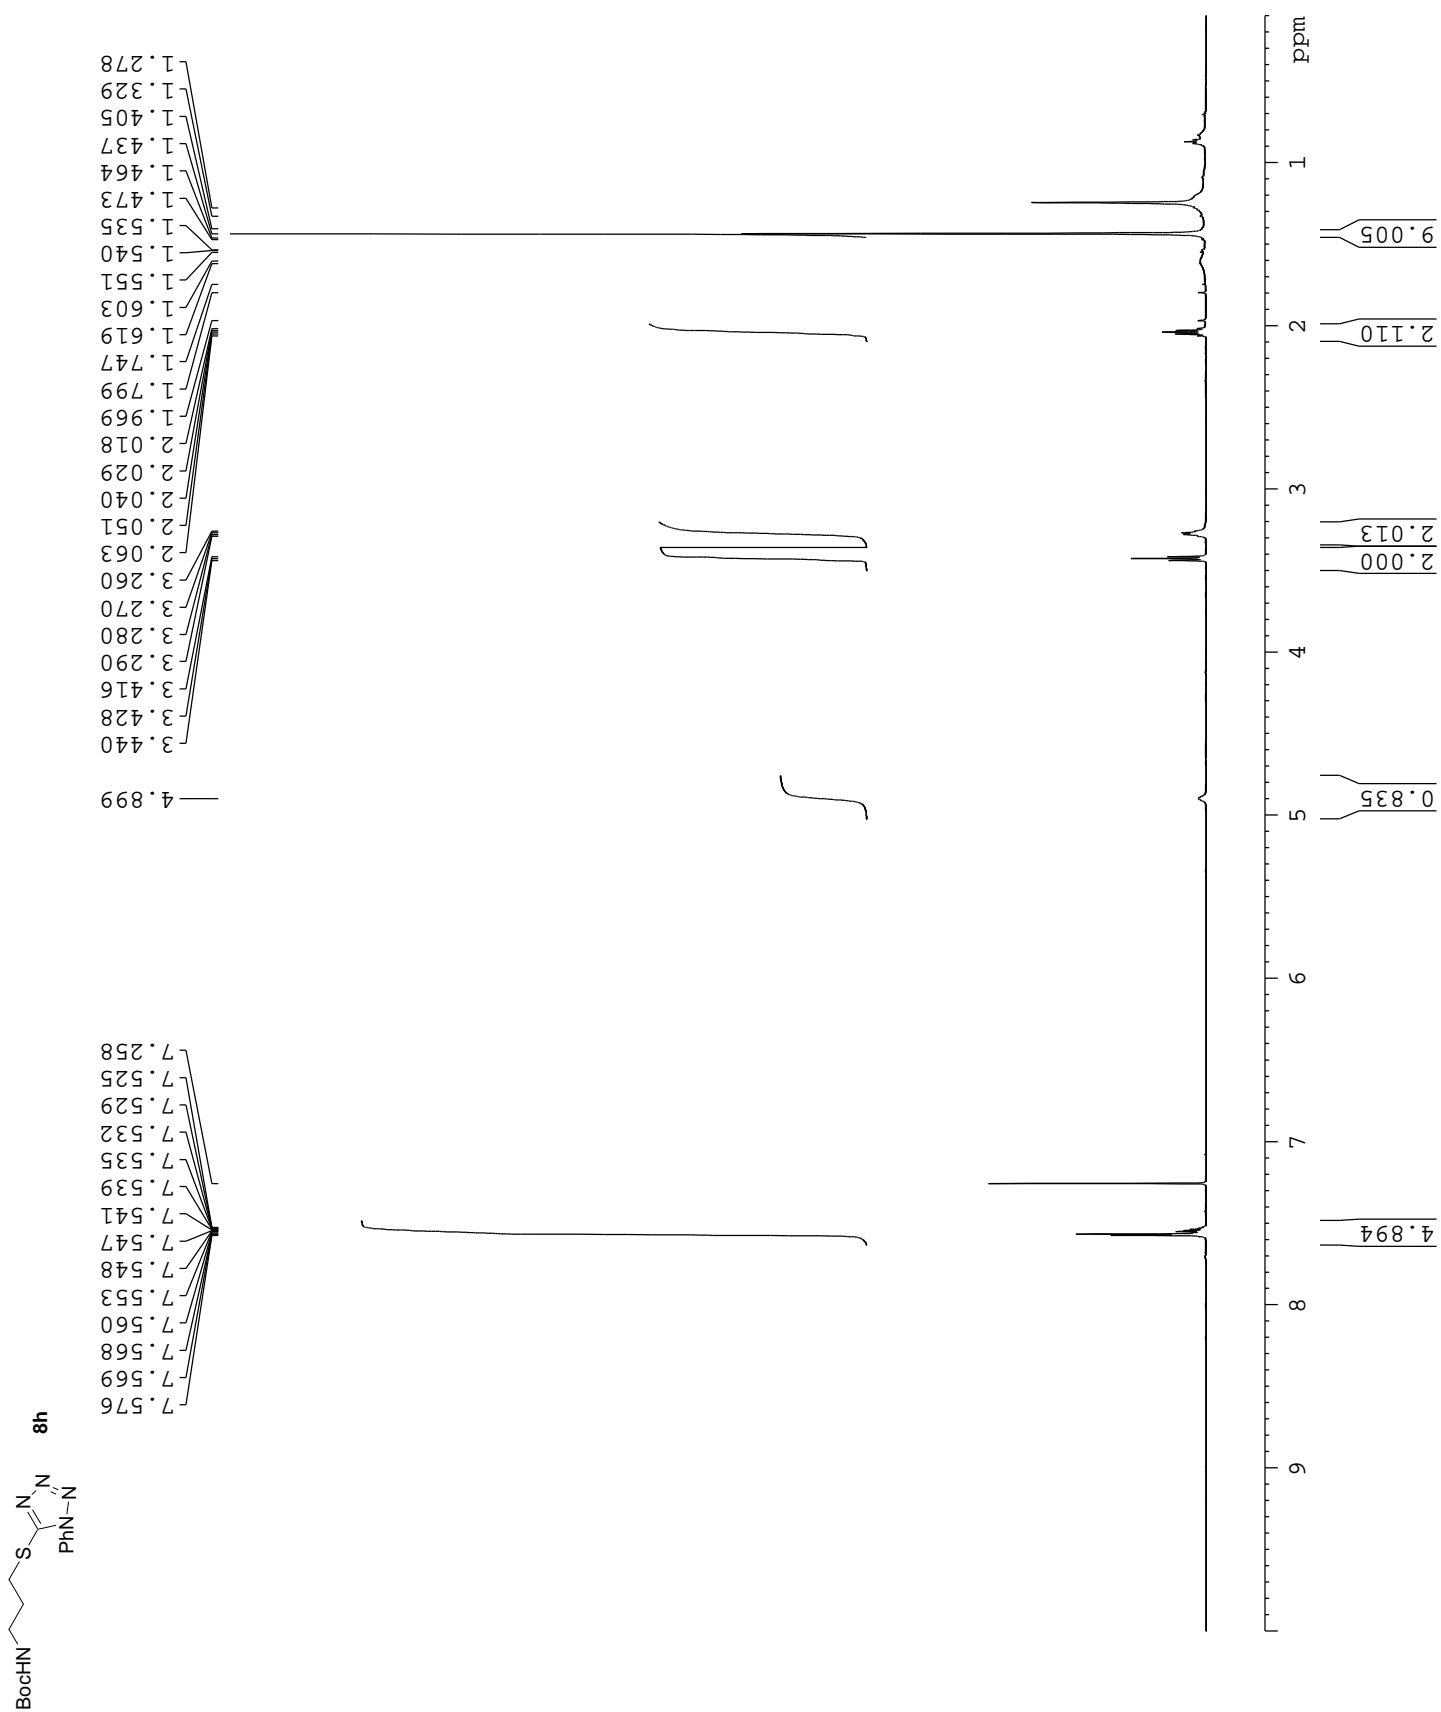

BocHN

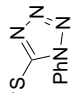

8h

156.188  
154.564

133.703  
130.298  
129.943  
123.959

79.561  
77.341  
77.130  
76.918

38.929  
32.050  
30.619  
30.279  
29.982  
29.827  
28.511

S26

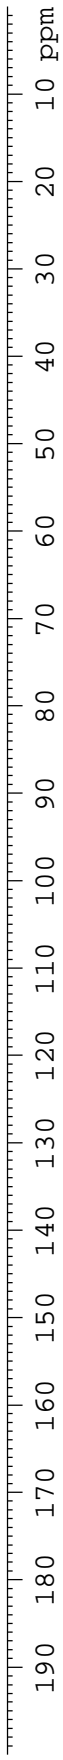

3.11 5-(1-Phenyl-1(H)-tetrazol-5-ylsulfanyl)pentan-1-ol (8i)

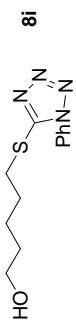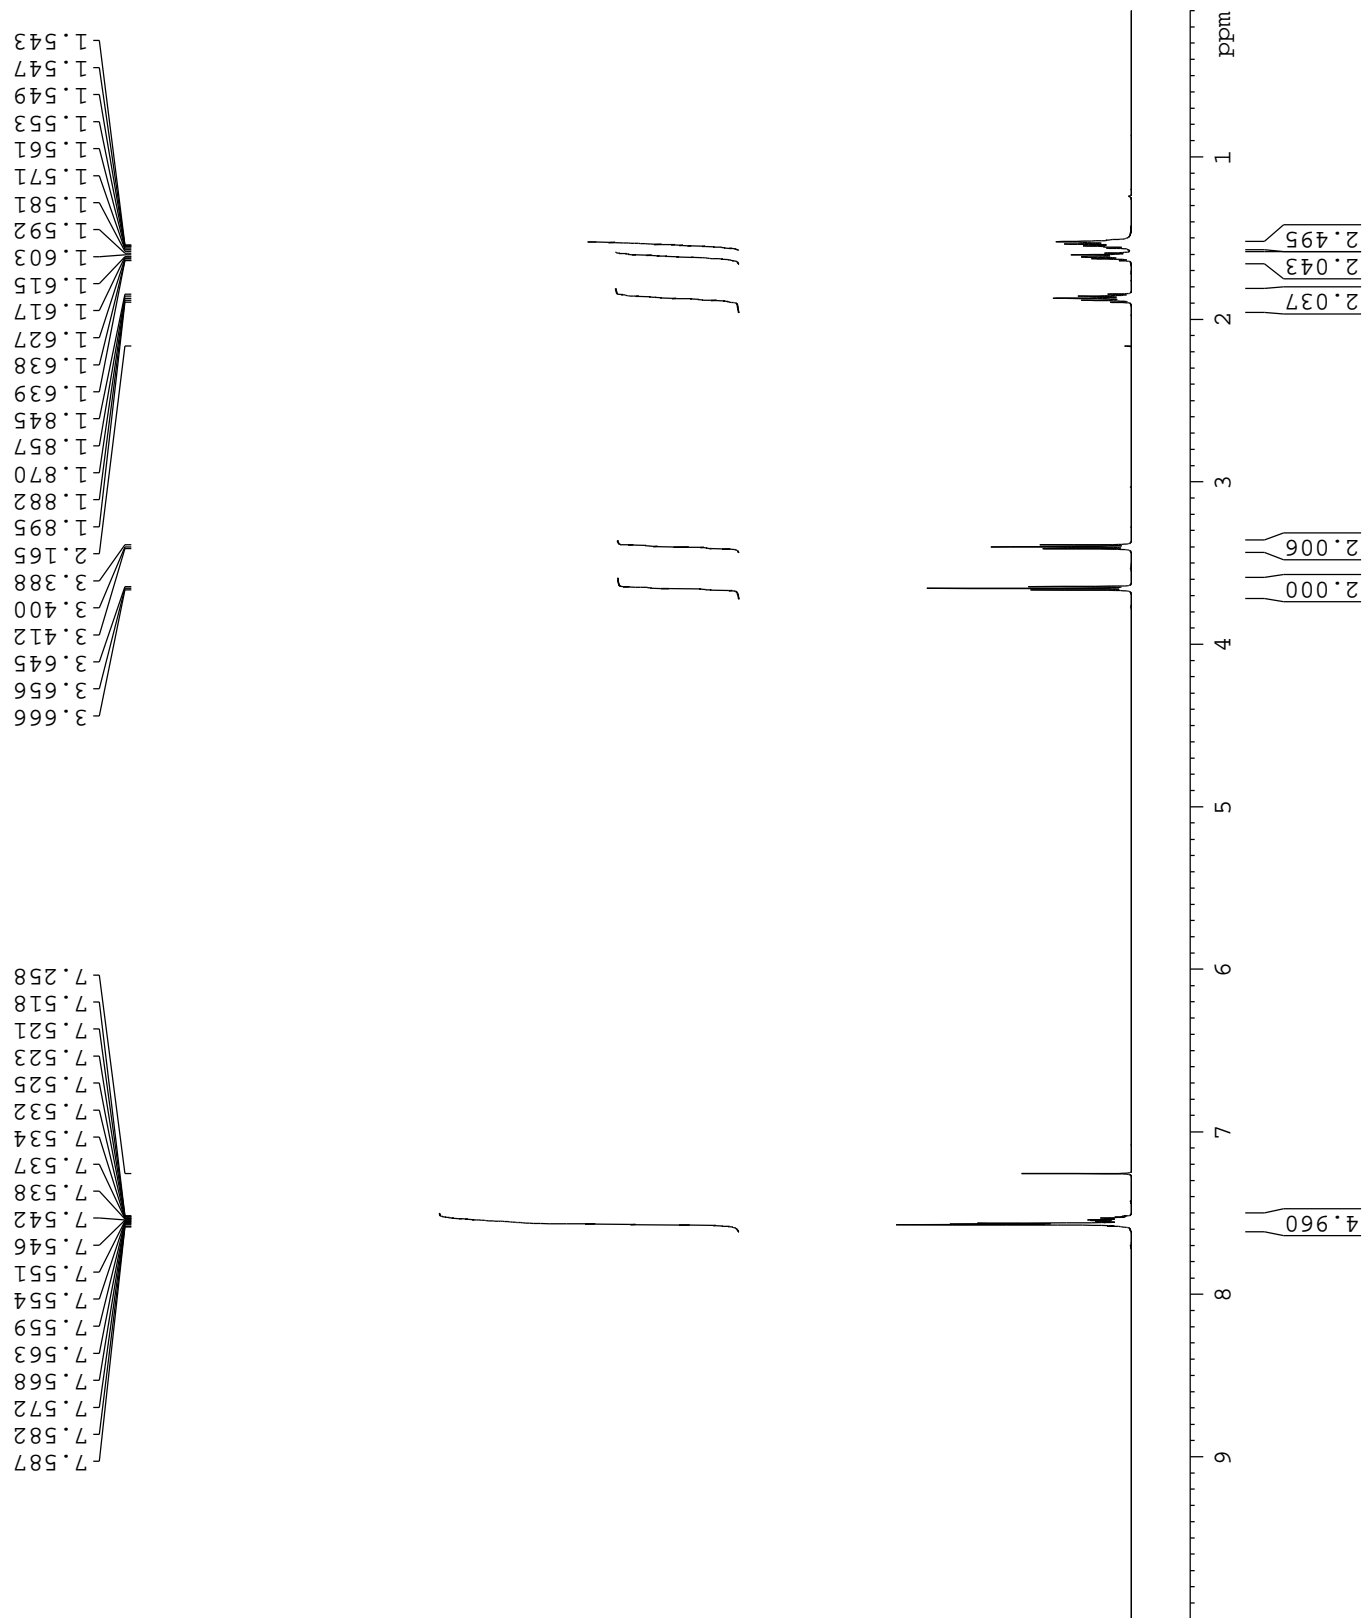



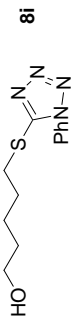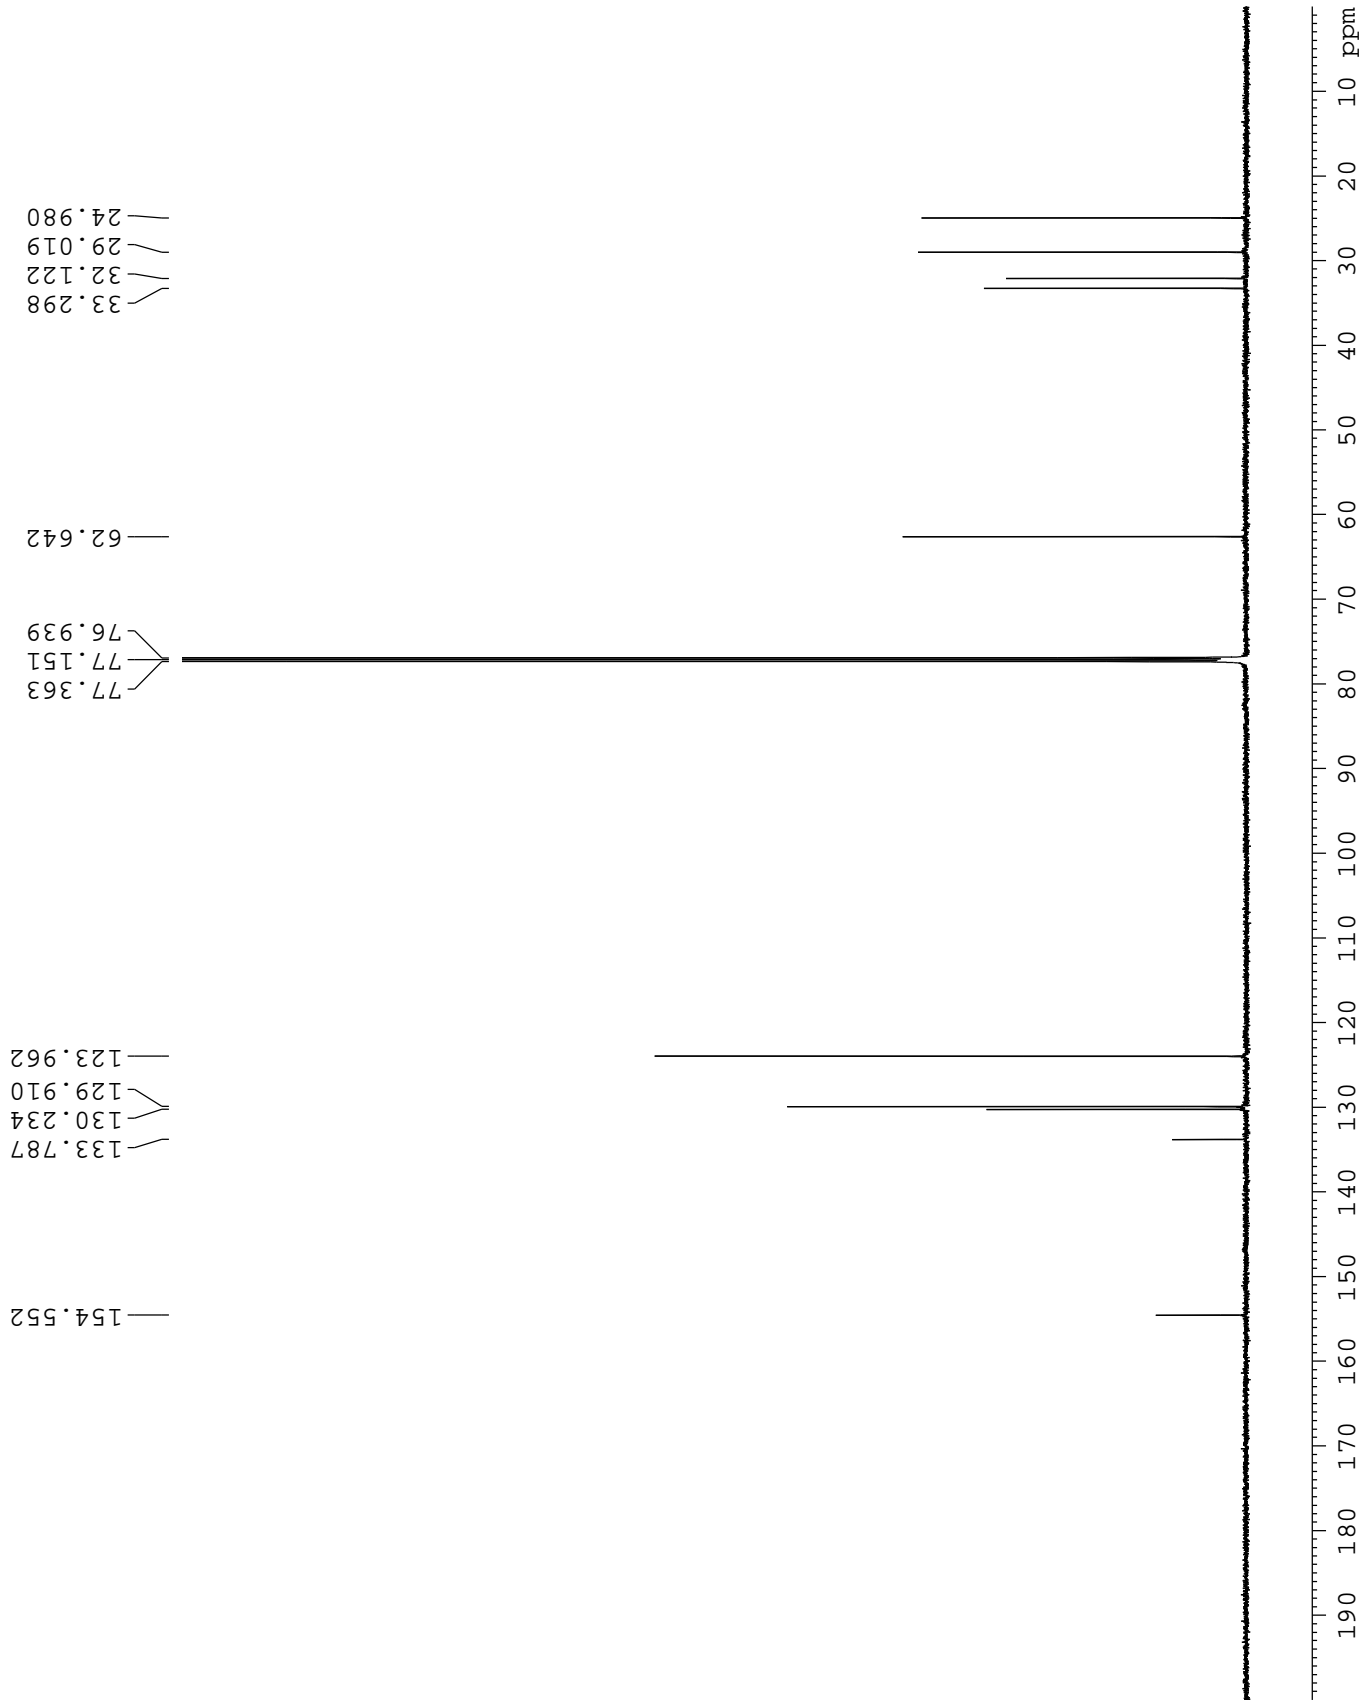

3.12 5-[4-Methylphenyl)methylsulfanyl]-1-phenyl-1(H)-1,2,3,4-tetrazole (8j)

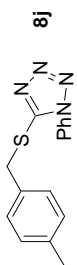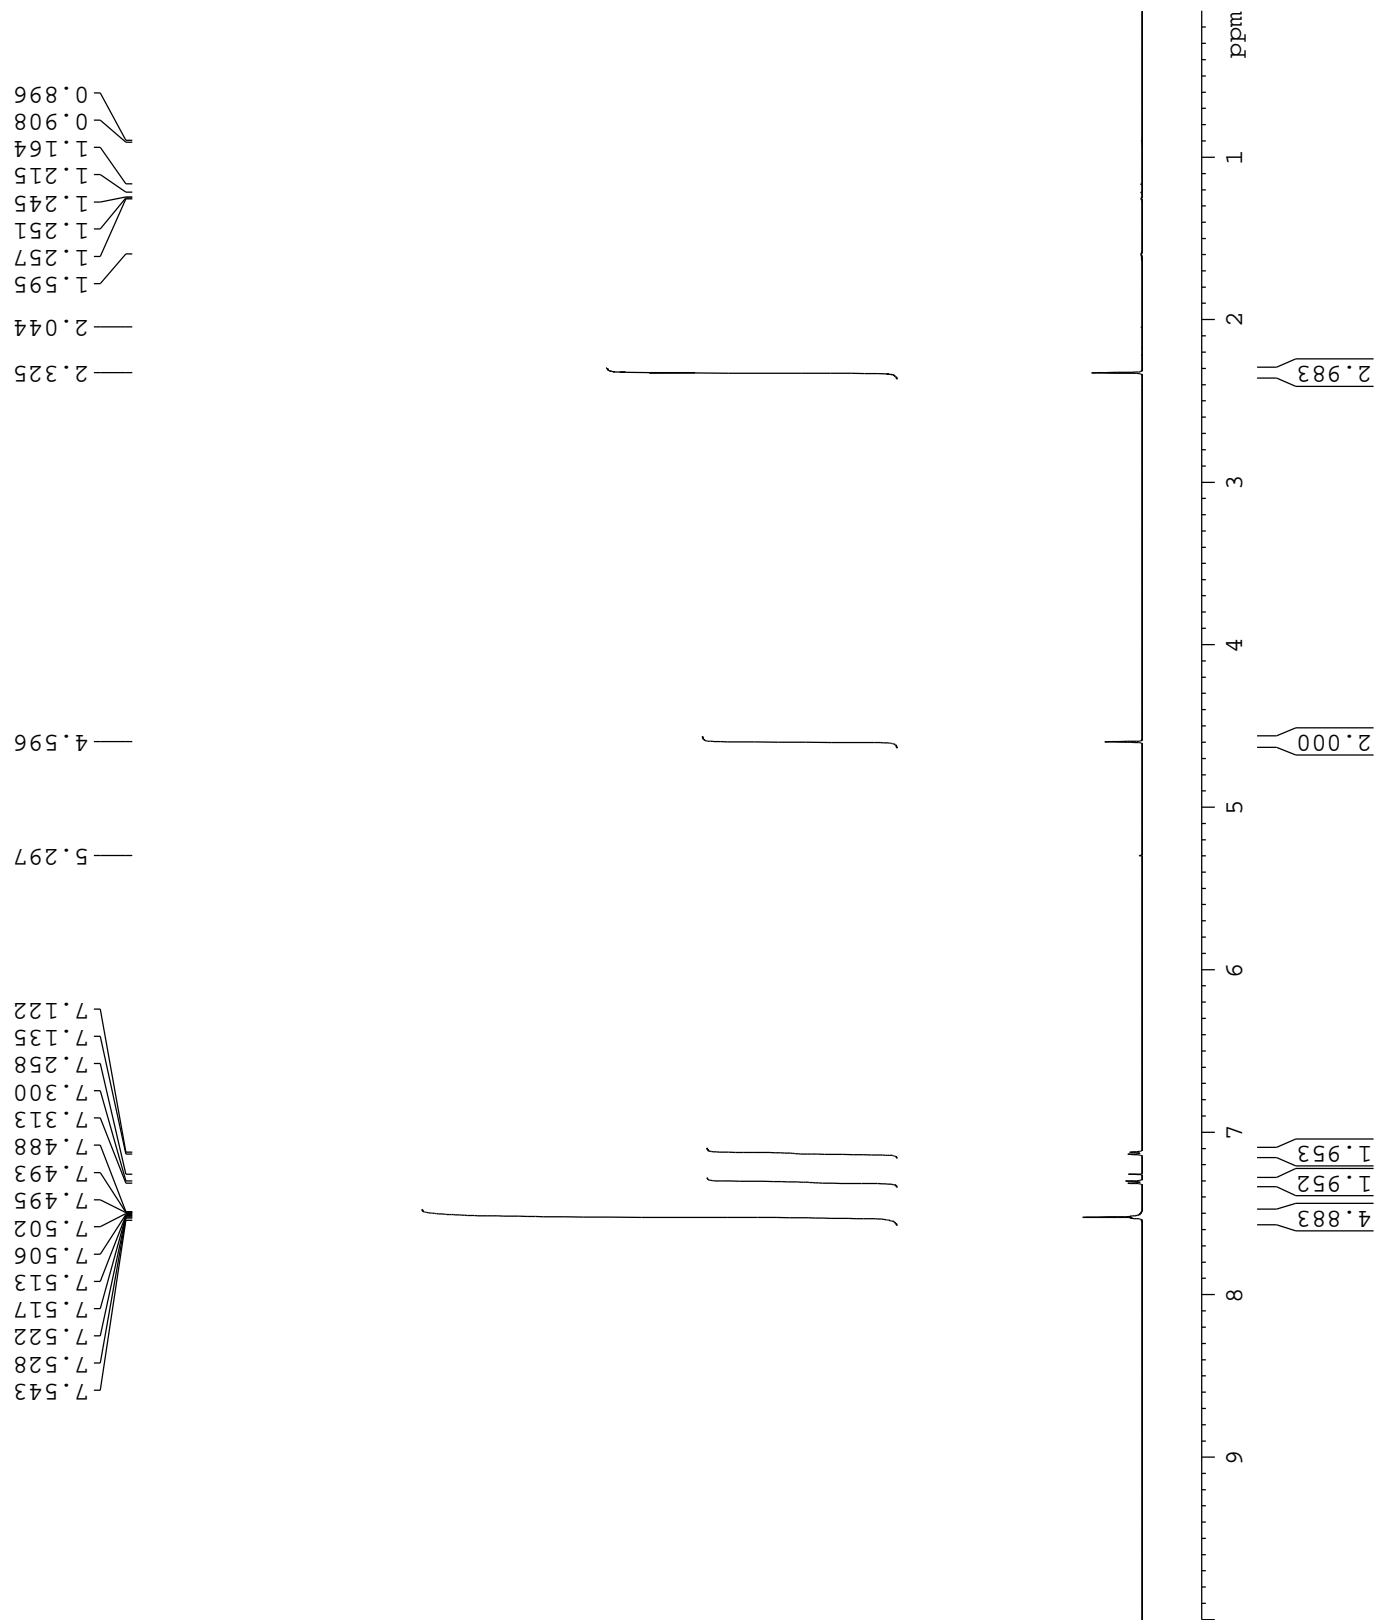

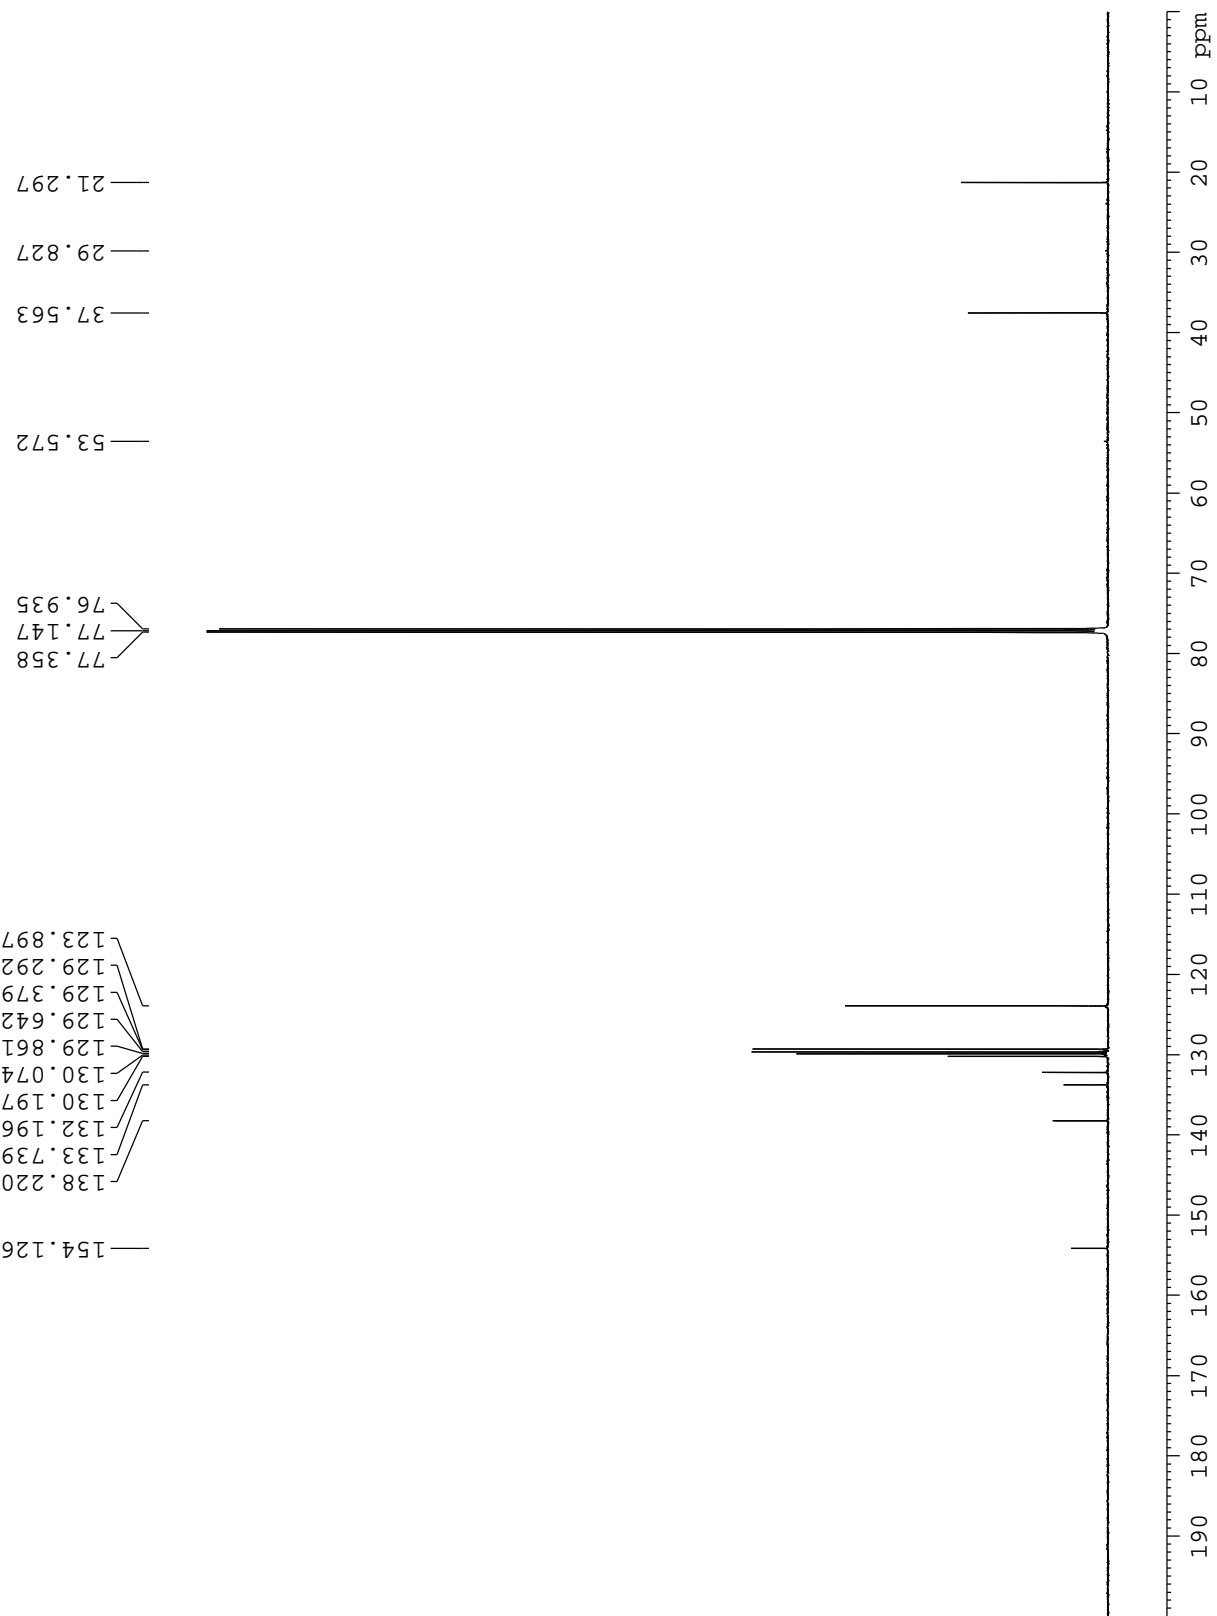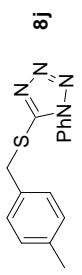

**3.13**    **(*E*)-5-(3-Phenylprop-2-enylsulfanyl)-1-phenyl-1(*H*)-tetrazole (8k)**



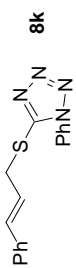

1.560  
1.498  
1.248  
1.213  
1.163  
0.907  
0.896  
0.879  
0.864

2.171

7.560  
7.558  
7.552  
7.549  
7.545  
7.541  
7.539  
7.534  
7.531  
7.528  
7.526  
7.524  
7.521  
7.517  
7.430  
7.363  
7.361  
7.348  
7.317  
7.305  
7.292  
7.258  
7.250  
7.247  
7.244  
7.235  
7.081  
6.729  
6.703  
6.382  
6.369  
6.356  
6.343  
6.331  
4.221  
4.220  
4.209  
4.207

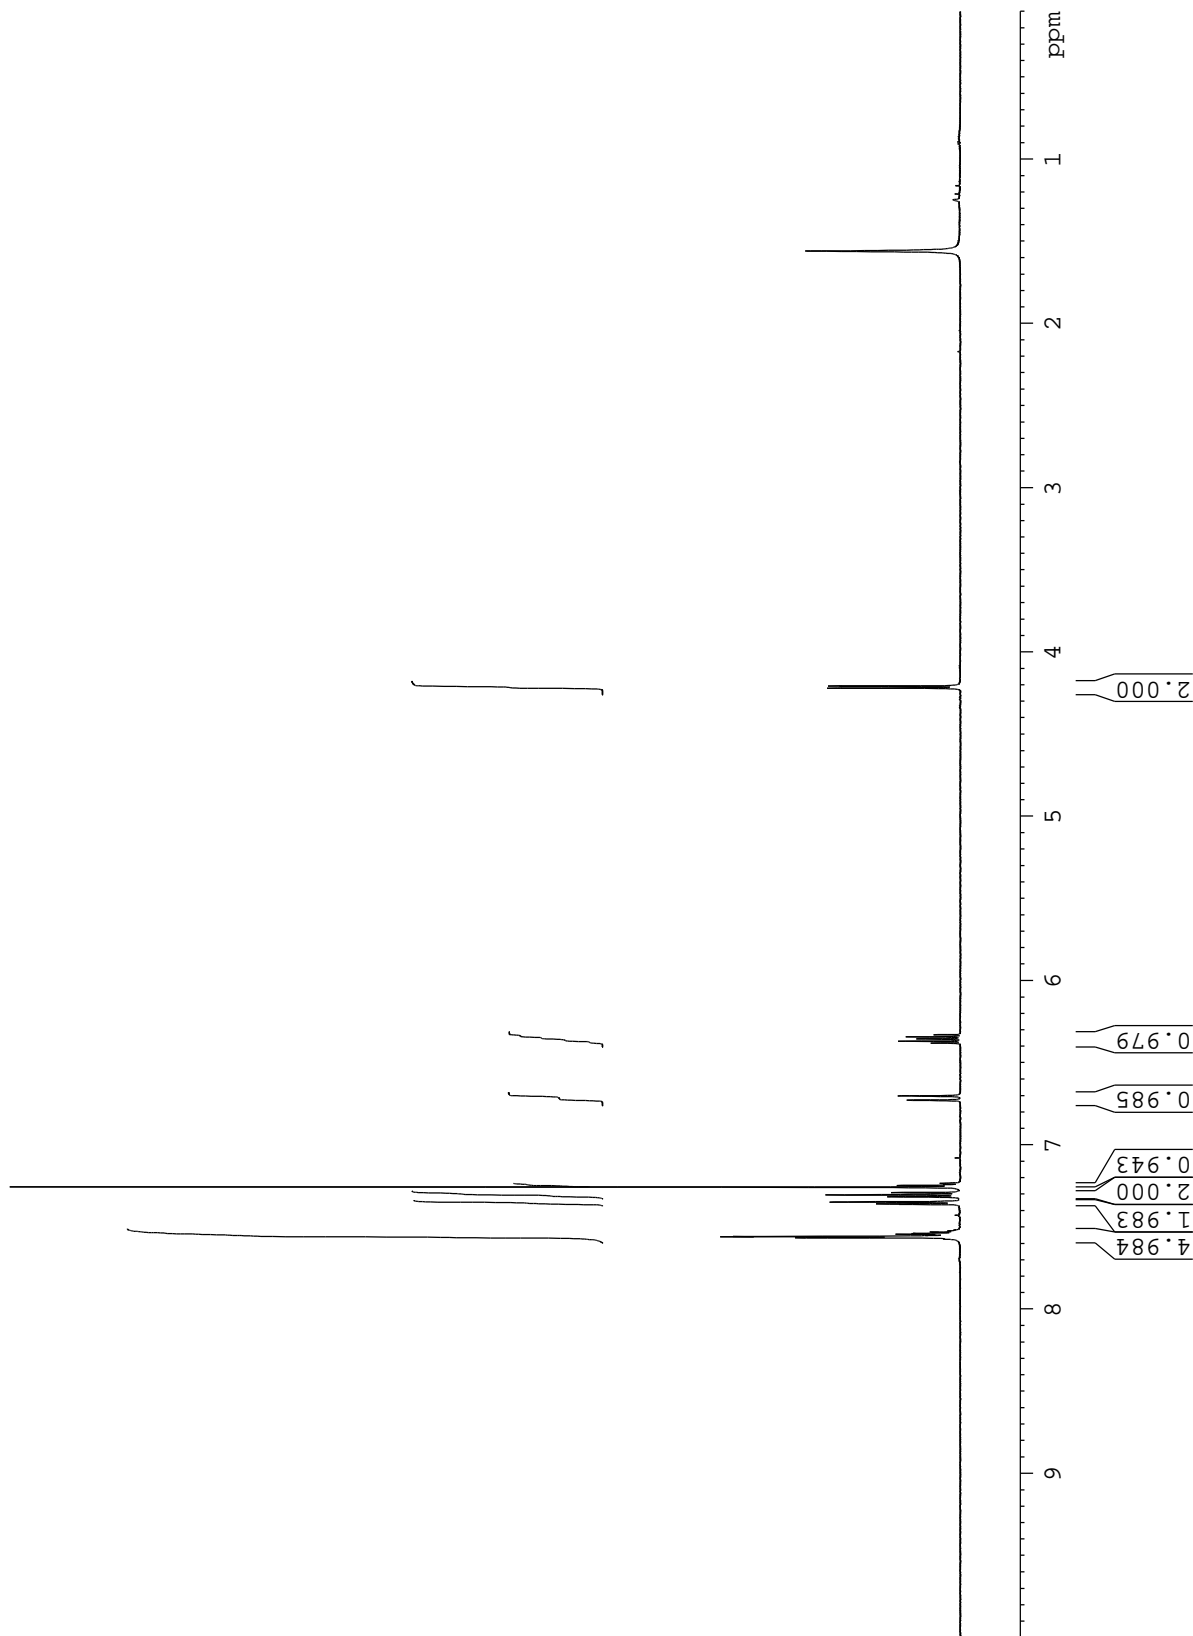

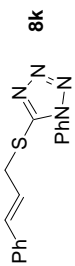

- 153.888
- 136.110
- 135.313
- 133.748
- 130.276
- 129.909
- 128.750
- 128.613
- 128.293
- 126.688
- 123.998
- 122.512
- 77.359
- 77.147
- 76.936
- 60.536
- 53.572
- 36.026
- 29.826
- 14.326

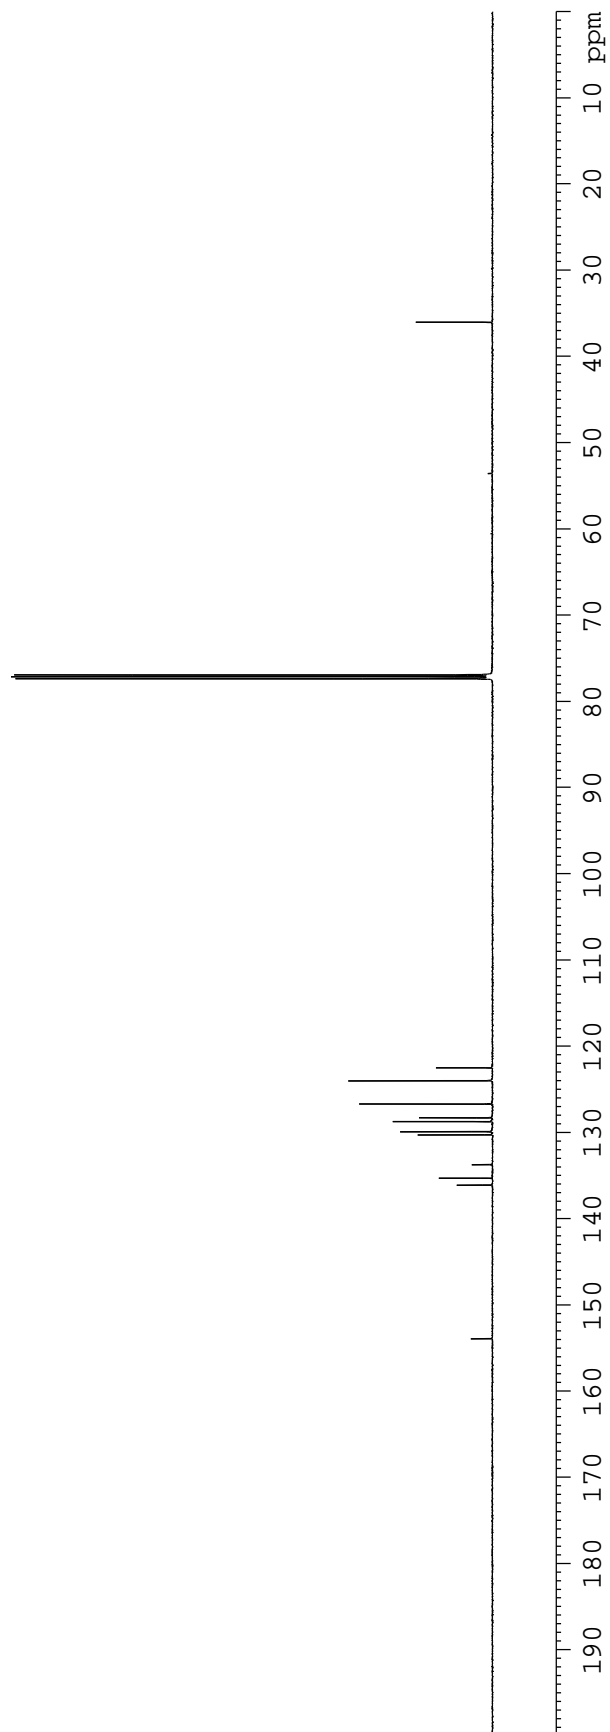

Supplement: c0ob00863j.pdf [file c0ob00863j.pdf]
